# Supplementary material
Source: PubMed Central journal article supplement (PMC6465722)
Supplement: mnp-0005-0052-s01.pdf [file mnp-0005-0052-s01.pdf]

| Protein ID  | Rank   | Rank     | Rank   | Rank     | Score  | Score    | Score  | Score    | Peptides  | Peptides  | Peptides  | Peptides  | Spectra | Spectra  | Spectra | Spectra  | emPAI  | emPAI    | emPAI  | emPAI    |
|-------------|--------|----------|--------|----------|--------|----------|--------|----------|-----------|-----------|-----------|-----------|---------|----------|---------|----------|--------|----------|--------|----------|
|             | XA1/SC | XA1/Ctrl | XA2/SC | XA2/Ctrl | XA1/SC | XA1/Ctrl | XA2/SC | XA2/Ctrl | XA1/SC    | XA1/Ctrl  | XA2/SC    | XA2/Ctrl  | XA1/SC  | XA1/Ctrl | XA2/SC  | XA2/Ctrl | XA1/SC | XA1/Ctrl | XA2/SC | XA2/Ctrl |
| IPI00783987 | 1      | 2        | 1      | 5        | 2798   | 2185     | 2461   | 693      | 176 (148) | 147 (122) | 157 (130) | 50 (38)   | 75 (66) | 67 (62)  | 72 (62) | 28 (22)  | 3.01   | 2.38     | 2.62   | 0.46     |
| IPI00220327 | 2.1    | 1.1      | 2.1    | 1.1      | 2589   | 2835     | 2225   | 3003     | 115 (104) | 119 (110) | 103 (95)  | 137 (123) | 38 (37) | 39 (36)  | 37 (35) | 41 (37)  | 8.3    | 7.86     | 7.44   | 9.24     |
| IPI00021304 | 2.2    | 1.2      | 2.2    | 1.2      | 1501   | 2051     | 1964   | 2159     | 69 (63)   | 86 (78)   | 84 (73)   | 94 (81)   | 31 (30) | 35 (33)  | 32 (29) | 33 (31)  | 4.73   | 7.44     | 5.62   | 6.66     |
| IPI00300725 | 2.3    | 1.3      | 2.3    | 1.3      | 452    | 800      | 893    | 631      | 34 (27)   | 48 (44)   | 66 (53)   | 40 (31)   | 20 (17) | 27 (25)  | 30 (28) | 21 (18)  | 1.6    | 2.98     | 4.47   | 1.74     |
| IPI00910738 | 2.4    | 1.4      | 2.4    | 1.5      | 380    | 731      | 750    | 530      | 30 (23)   | 40 (36)   | 56 (44)   | 34 (26)   | 17 (14) | 23 (21)  | 25 (23) | 18 (15)  | 1.36   | 2.52     | 3.68   | 1.5      |
| IPI00009867 | 2.5    | 1.5      | 2.5    | 1.4      | 328    | 509      | 509    | 579      | 32 (25)   | 41 (35)   | 41 (32)   | 39 (31)   | 19 (17) | 22 (19)  | 22 (19) | 22 (17)  | 1.51   | 1.78     | 1.78   | 1.51     |
| IPI00376379 | 2.6    | 1.6      | 2.6    | 1.7      | 120    | 245      | 177    | 125      | 8 (7)     | 15 (14)   | 12 (10)   | 10 (7)    | 3 (3)   | 6 (5)    | 6 (5)   | 4 (3)    | 0.17   | 0.36     | 0.29   | 0.17     |
| IPI00290857 | 2.7    |          |        | 1.6      | 71     |          |        | 210      | 7 (5)     |           |           | 12 (10)   | 4 (4)   |          |         | 5 (4)    | 0.22   |          |        | 0.28     |
| IPI00174775 | 2.8    |          | 2.7    | 1.8      | 64     |          | 55     | 82       | 7 (5)     |           | 8 (5)     | 7 (5)     | 3 (3)   |          | 4 (3)   | 3 (2)    | 0.24   |          | 0.24   | 0.18     |
| IPI00022229 | 3      | 13       | 3      |          | 2151   | 445      | 2098   |          | 134 (116) | 33 (25)   | 133 (118) |           | 76 (65) | 20 (16)  | 76 (67) |          | 0.54   | 0.11     | 0.56   |          |
| IPI00009865 | 4.1    | 3.1      | 4.1    | 2.1      | 1730   | 1889     | 1914   | 2063     | 88 (76)   | 104 (92)  | 95 (80)   | 102 (91)  | 32 (29) | 34 (32)  | 35 (30) | 34 (33)  | 7.28   | 11.11    | 8.23   | 9.86     |
| IPI00019359 | 4.2    | 3.2      | 4.2    | 2.2      | 1423   | 1751     | 1347   | 1557     | 76 (66)   | 96 (79)   | 75 (60)   | 104 (87)  | 32 (31) | 34 (30)  | 30 (26) | 37 (34)  | 5.71   | 6.06     | 4.19   | 10.22    |
| IPI00384444 | 4.3    | 3.3      | 4.4    | 2.3      | 690    | 697      | 749    | 1059     | 39 (37)   | 41 (39)   | 46 (42)   | 59 (50)   | 18 (17) | 17 (17)  | 21 (20) | 21 (20)  | 2.22   | 2.22     | 3.39   | 3.39     |
| IPI00217963 | 4.4    | 3.4      | 4.3    | 2.4      | 627    | 582      | 755    | 613      | 31 (29)   | 37 (35)   | 46 (42)   | 48 (39)   | 13 (12) | 14 (14)  | 20 (19) | 19 (17)  | 1.24   | 1.69     | 2.9    | 2.24     |
| IPI00450768 | 4.5    | 3.6      | 4.6    |          | 279    | 313      | 336    |          | 14 (14)   | 19 (18)   | 21 (18)   |           | 8 (8)   | 8 (8)    | 11 (10) |          | 0.69   | 0.81     | 1.07   |          |
| IPI00828156 | 5.1    | 4.11     | 5.8    | 9.4      | 95     | 112      | 113    | 69       | 4 (4)     | 4 (4)     | 4 (4)     | 4 (4)     | 2 (2)   | 2 (2)    | 2 (2)   | 2 (2)    | 0.58   | 0.58     | 0.58   | 0.58     |
| IPI00550731 | 5.1    | 4.1      | 5.1    | 3.1      | 1486   | 1273     | 1286   | 881      | 57 (53)   | 47 (44)   | 42 (39)   | 28 (27)   | 9 (9)   | 8 (8)    | 8 (8)   | 8 (7)    | 4.91   | 4.25     | 3.66   | 2.27     |
| IPI00384400 | 5.11   |          | 5.1    |          | 83     |          | 93     |          | 3 (3)     |           | 3 (3)     |           | 2 (2)   |          | 2 (2)   |          | 0.56   |          | 0.56   |          |
| IPI00387113 | 5.12   | 4.7      | 5.12   |          | 79     | 152      | 71     |          | 6 (4)     | 6 (6)     | 5 (4)     |           | 2 (2)   | 2 (2)    | 2 (2)   |          | 1.16   | 1.16     | 1.16   |          |
| IPI00387116 | 5.13   | 4.15     | 5.11   | 3.3      | 77     | 66       | 72     | 67       | 4 (4)     | 4 (4)     | 4 (4)     | 4 (4)     | 2 (2)   | 2 (2)    | 2 (2)   | 2 (2)    | 0.74   | 0.74     | 0.74   | 0.74     |
| IPI00384938 | 5.2    | 4.3      | 5.2    | 9.1      | 932    | 926      | 702    | 430      | 88 (65)   | 75 (57)   | 60 (47)   | 45 (34)   | 14 (14) | 14 (14)  | 14 (14) | 13 (12)  | 2.51   | 2.3      | 2.3    | 1.6      |
| IPI00399007 | 5.3    | 4.5      | 5.4    |          | 526    | 366      | 370    |          | 45 (36)   | 36 (28)   | 30 (24)   |           | 11 (10) | 9 (9)    | 7 (7)   |          | 1.43   | 1.12     | 1.12   |          |
| IPI00168728 | 5.4    | 4.4      | 5.3    |          | 514    | 378      | 414    |          | 48 (40)   | 36 (26)   | 34 (28)   |           | 11 (11) | 8 (8)    | 9 (8)   |          | 1.31   | 0.75     | 1.07   |          |
| IPI00977788 | 5.5    |          | 5.5    | 9.3      | 267    |          | 229    | 157      | 17 (14)   |           | 14 (12)   | 9 (8)     | 5 (5)   |          | 5 (4)   | 4 (3)    | 2.2    |          | 1.71   | 0.65     |
| IPI00981659 | 5.6    |          |        |          | 237    |          |        |          | 13 (10)   |           |           |           | 5 (4)   |          |         |          | 1.76   |          |        |          |
| IPI00930442 | 5.7    | 4.9      | 5.7    | 9.2      | 222    | 137      | 163    | 193      | 26 (18)   | 22 (15)   | 18 (13)   | 14 (8)    | 8 (8)   | 8 (8)    | 7 (7)   | 6 (5)    | 0.83   | 0.62     | 0.72   | 0.35     |
| IPI00387115 | 5.8    | 4.6      | 5.6    |          | 186    | 214      | 200    |          | 10 (9)    | 10 (10)   | 9 (8)     |           | 4 (4)   | 4 (4)    | 4 (4)   |          | 2.56   | 2.56     | 2.56   |          |
| IPI00382497 | 5.9    | 4.13     | 5.15   |          | 184    | 71       | 44     |          | 5 (5)     | 3 (3)     | 2 (2)     |           | 2 (2)   | 2 (2)    | 2 (2)   |          | 1.06   | 1.06     | 0.62   |          |
| IPI00643525 | 6      | 11       | 6      |          | 1288   | 537      | 944    |          | 91 (78)   | 44 (33)   | 72 (64)   |           | 43 (41) | 26 (22)  | 40 (36) |          | 1.15   | 0.47     | 0.91   |          |
| IPI00478003 | 7.1    | 5        | 7      | 10       | 855    | 911      | 814    | 403      | 53 (47)   | 59 (49)   | 51 (46)   | 32 (25)   | 29 (27) | 31 (29)  | 29 (27) | 20 (17)  | 0.73   | 0.77     | 0.73   | 0.4      |
| IPI00025426 | 7.2    |          |        |          | 164    |          |        |          | 7 (7)     |           |           |           | 4 (4)   |          |         |          | 0.08   |          |        |          |
| IPI00745872 | 8      | 6        | 8      | 4        | 770    | 682      | 785    | 749      | 65 (50)   | 50 (42)   | 59 (48)   | 54 (42)   | 28 (23) | 26 (23)  | 22 (20) | 21 (18)  | 2.23   | 1.95     | 1.82   | 1.35     |
| IPI00896380 | 9.1    | 12.1     | 11.1   | 16.1     | 769    | 518      | 587    | 216      | 46 (40)   | 37 (34)   | 36 (34)   | 20 (13)   | 13 (12) | 14 (14)  | 13 (13) | 10 (7)   | 2      | 1.82     | 1.82   | 0.73     |
| IPI00479708 | 9.2    | 12.2     | 11.2   | 16.2     | 715    | 476      | 514    | 177      | 43 (37)   | 39 (36)   | 36 (34)   | 20 (12)   | 13 (12) | 14 (14)  | 13 (13) | 10 (7)   | 2.37   | 2.93     | 2.64   | 0.98     |
| IPI00021841 | 10     | 7        | 10     | 7        | 754    | 610      | 634    | 556      | 35 (31)   | 29 (24)   | 36 (29)   | 26 (23)   | 15 (14) | 15 (11)  | 15 (12) | 14 (11)  | 4.73   | 2.43     | 3.67   | 2.43     |
| IPI00386524 | 11.1   | 14.1     | 12.1   | 24.1     | 738    | 436      | 558    | 109      | 32 (28)   | 25 (22)   | 29 (28)   | 12 (7)    | 11 (10) | 10 (10)  | 10 (9)  | 6 (5)    | 0.91   | 0.91     | 0.91   | 0.34     |
| IPI00784830 | 11.2   | 14.2     | 12.2   |          | 429    | 218      | 338    |          | 18 (15)   | 18 (13)   | 18 (18)   |           | 7 (6)   | 8 (7)    | 6 (6)   |          | 0.52   | 0.61     | 0.61   |          |
| IPI00423461 | 11.3   | 14.3     |        |          | 106    | 121      |        |          | 5 (5)     | 6 (6)     |           |           | 3 (3)   | 4 (4)    |         |          | 0.19   | 0.26     |        |          |

|             |      |      |      |      |     |     |     |     |         |         |          |          |         |         |         |         |      |      |      |      |
|-------------|------|------|------|------|-----|-----|-----|-----|---------|---------|----------|----------|---------|---------|---------|---------|------|------|------|------|
| IPI00298497 | 12   | 26   | 9    | 27   | 723 | 259 | 715 | 96  | 45 (36) | 16 (12) | 39 (32)  | 6 (3)    | 22 (19) | 12 (10) | 20 (17) | 5 (2)   | 2.67 | 0.76 | 1.93 | 0.12 |
| IPI00021885 | 13   | 36   | 26   | 37   | 595 | 176 | 282 | 70  | 37 (33) | 10 (6)  | 23 (17)  | 5 (4)    | 17 (15) | 6 (3)   | 11 (10) | 4 (3)   | 0.83 | 0.11 | 0.5  | 0.11 |
| IPI00887169 | 14.1 | 10.2 | 18.1 | 15.3 | 549 | 483 | 373 | 146 | 31 (30) | 29 (28) | 17 (17)  | 12 (12)  | 7 (6)   | 6 (6)   | 6 (6)   | 4 (4)   | 2.91 | 2.91 | 1.7  | 1.38 |
| IPI00807428 | 14.2 | 10.3 | 18.3 |      | 458 | 394 | 278 |     | 27 (27) | 27 (25) | 15 (14)  |          | 5 (5)   | 5 (5)   | 5 (5)   |         | 2.51 | 2.51 | 1.41 |      |
| IPI00719373 | 14.3 | 10.1 | 18.4 | 15.2 | 422 | 505 | 270 | 169 | 26 (23) | 23 (23) | 15 (14)  | 7 (7)    | 5 (5)   | 5 (5)   | 5 (5)   | 4 (4)   | 2.02 | 2.42 | 1.36 | 1.09 |
| IPI01022820 | 14.4 | 10.4 |      |      | 50  | 39  |     |     | 3 (3)   | 3 (3)   |          |          | 2 (2)   | 2 (2)   |         |         | 0.63 | 0.63 |      |      |
| IPI00021891 | 15   | 20   | 16   | 53   | 547 | 331 | 433 | 44  | 34 (28) | 17 (16) | 30 (27)  | 4 (4)    | 16 (14) | 10 (9)  | 12 (11) | 3 (3)   | 1.67 | 0.74 | 1.36 | 0.2  |
| IPI01025580 | 16   | 17   | 14   | 8    | 536 | 379 | 507 | 548 | 98 (75) | 92 (60) | 103 (72) | 103 (76) | 1 (1)   | 1 (1)   | 1 (1)   | 1 (1)   | 1.81 | 1.81 | 1.81 | 1.81 |
| IPI00553177 | 17   | 8    | 17   | 13   | 524 | 596 | 422 | 268 | 30 (23) | 38 (29) | 30 (24)  | 19 (13)  | 15 (13) | 20 (16) | 16 (12) | 11 (8)  | 1.78 | 2.41 | 1.59 | 0.85 |
| IPI00215894 | 18   | 21   | 19   | 46   | 477 | 319 | 361 | 47  | 26 (23) | 19 (19) | 23 (22)  | 6 (4)    | 14 (12) | 11 (11) | 11 (11) | 3 (3)   | 1.19 | 1.05 | 1.05 | 0.22 |
| IPI00292530 | 19   | 18   | 21   | 38   | 476 | 367 | 334 | 69  | 24 (18) | 15 (14) | 16 (13)  | 3 (3)    | 12 (9)  | 8 (8)   | 8 (7)   | 2 (2)   | 0.37 | 0.33 | 0.29 | 0.07 |
| IPI00032220 | 20   | 19   | 15   | 52   | 470 | 339 | 446 | 45  | 23 (23) | 16 (14) | 23 (22)  | 2 (2)    | 9 (9)   | 8 (8)   | 9 (9)   | 1 (1)   | 0.93 | 0.71 | 0.93 | 0.06 |
| IPI00218192 | 21   | 32   | 29   | 49   | 430 | 200 | 267 | 46  | 26 (23) | 15 (13) | 16 (15)  | 3 (2)    | 16 (13) | 9 (8)   | 8 (8)   | 2 (1)   | 0.51 | 0.29 | 0.29 | 0.03 |
| IPI00305461 | 22   | 31   | 24   |      | 410 | 206 | 300 |     | 25 (22) | 21 (19) | 20 (19)  |          | 11 (10) | 9 (8)   | 9 (9)   |         | 0.44 | 0.39 | 0.44 |      |
| IPI00304273 | 23   | 15   | 20   | 12   | 398 | 394 | 353 | 309 | 31 (23) | 31 (22) | 29 (23)  | 28 (22)  | 17 (13) | 15 (11) | 16 (15) | 15 (14) | 1.67 | 1.32 | 2.07 | 1.67 |
| IPI00555812 | 24   | 16   | 30   | 11   | 375 | 389 | 265 | 330 | 15 (13) | 17 (14) | 15 (13)  | 15 (13)  | 8 (7)   | 8 (7)   | 8 (8)   | 8 (6)   | 0.6  | 0.6  | 0.7  | 0.51 |
| IPI00477597 | 25.1 | 28.2 | 31.1 | 21.2 | 370 | 218 | 263 | 127 | 24 (22) | 16 (13) | 19 (15)  | 12 (9)   | 14 (13) | 12 (10) | 12 (10) | 7 (5)   | 2.34 | 1.23 | 1.23 | 0.49 |
| IPI00641737 | 25.2 | 28.1 | 31.2 | 21.1 | 311 | 237 | 213 | 137 | 25 (23) | 24 (18) | 20 (16)  | 18 (13)  | 12 (12) | 14 (11) | 10 (9)  | 9 (7)   | 1.84 | 1.3  | 1    | 0.74 |
| IPI00879573 | 26   | 27   | 23   | 79   | 366 | 249 | 301 | 28  | 29 (25) | 20 (16) | 21 (20)  | 7 (2)    | 16 (13) | 10 (8)  | 12 (11) | 5 (1)   | 1.32 | 0.65 | 0.85 | 0.06 |
| IPI00019580 | 27   | 35   | 27   |      | 348 | 183 | 273 |     | 18 (17) | 8 (8)   | 17 (14)  |          | 11 (10) | 5 (5)   | 12 (9)  |         | 0.41 | 0.19 | 0.36 |      |
| IPI00022463 | 28   | 9    | 13   | 6    | 331 | 572 | 548 | 640 | 29 (24) | 32 (29) | 34 (27)  | 41 (33)  | 16 (14) | 19 (19) | 18 (16) | 20 (17) | 0.84 | 1.25 | 0.91 | 1.34 |
| IPI00847635 | 29   | 24   | 32   |      | 327 | 291 | 251 |     | 10 (9)  | 9 (9)   | 7 (7)    |          | 5 (5)   | 5 (5)   | 4 (4)   |         | 0.4  | 0.4  | 0.31 |      |
| IPI00654755 | 30.1 | 23   | 28   | 14   | 308 | 294 | 272 | 218 | 20 (18) | 20 (18) | 18 (15)  | 13 (13)  | 10 (10) | 10 (10) | 10 (9)  | 7 (7)   | 5.76 | 7.19 | 4.59 | 2.81 |
| IPI00473011 | 30.2 |      |      |      | 143 |     |     |     | 12 (10) |         |          |          | 6 (6)   |         |         |         | 2.12 |      |      |      |
| IPI00022431 | 31.1 | 22   | 25.1 | 28.1 | 302 | 300 | 296 | 96  | 28 (23) | 20 (16) | 25 (20)  | 7 (7)    | 9 (7)   | 6 (6)   | 6 (5)   | 3 (3)   | 0.95 | 0.71 | 0.71 | 0.31 |

|      |      |      |      |     |     |     |     |         |         |         |       |         |         |         |       |      |      |      |      |
|------|------|------|------|-----|-----|-----|-----|---------|---------|---------|-------|---------|---------|---------|-------|------|------|------|------|
| 31.2 |      | 25.2 | 28.2 | 144 |     | 204 | 48  | 13 (11) |         | 14 (12) | 4 (4) | 6 (5)   |         | 4 (4)   | 2 (2) | 0.97 |      | 0.76 | 0.25 |
| 32   | 74   | 52   |      | 257 | 46  | 111 |     | 11 (11) | 3 (3)   | 5 (5)   |       | 8 (8)   | 2 (2)   | 3 (3)   |       | 0.43 | 0.09 | 0.14 |      |
| 33   | 25   | 38   | 45   | 256 | 277 | 180 | 51  | 21 (15) | 23 (18) | 18 (13) | 3 (2) | 13 (8)  | 12 (10) | 10 (8)  | 2 (1) | 0.69 | 0.79 | 0.59 | 0.06 |
| 34   | 33   | 87   |      | 249 | 200 | 47  |     | 15 (12) | 19 (16) | 8 (4)   |       | 9 (7)   | 11 (8)  | 7 (3)   |       | 0.29 | 0.34 | 0.1  |      |
| 35   | 38   | 22   |      | 241 | 165 | 315 |     | 19 (18) | 14 (14) | 21 (20) |       | 10 (10) | 8 (8)   | 10 (10) |       | 0.52 | 0.4  | 0.52 |      |
| 36   | 42   | 44   | 26   | 240 | 140 | 143 | 96  | 17 (12) | 11 (10) | 10 (8)  | 5 (4) | 9 (7)   | 6 (6)   | 6 (4)   | 3 (2) | 0.59 | 0.5  | 0.34 | 0.12 |
| 37   | 46   | 39   | 57   | 231 | 114 | 178 | 38  | 8 (8)   | 3 (3)   | 5 (5)   | 2 (1) | 4 (4)   | 2 (2)   | 3 (3)   | 1 (1) | 0.38 | 0.17 | 0.27 | 0.08 |
| 38   | 30   | 33   | 20   | 218 | 209 | 220 | 144 | 19 (17) | 16 (12) | 15 (14) | 9 (8) | 6 (6)   | 5 (5)   | 6 (6)   | 4 (4) | 5.06 | 3.06 | 3.96 | 1.72 |
| 39   | 29   | 40   | 40   | 216 | 232 | 177 | 66  | 13 (10) | 10 (10) | 7 (7)   | 3 (3) | 7 (6)   | 5 (5)   | 5 (5)   | 2 (2) | 2.84 | 1.62 | 1.62 | 0.47 |
| 40   | 4.8  | 50   | 41   | 194 | 142 | 118 | 65  | 11 (4)  | 10 (6)  | 9 (3)   | 6 (3) | 3 (1)   | 3 (3)   | 3 (2)   | 3 (2) | 0.23 | 0.85 | 0.51 | 0.51 |
| 41   | 78   | 48   |      | 187 | 44  | 123 |     | 15 (11) | 6 (4)   | 12 (7)  |       | 8 (7)   | 4 (3)   | 7 (5)   |       | 0.49 | 0.16 | 0.28 |      |
| 42   | 41   | 34   | 50   | 184 | 152 | 215 | 45  | 14 (13) | 12 (10) | 13 (13) | 3 (3) | 7 (7)   | 7 (6)   | 8 (8)   | 2 (2) | 0.75 | 0.61 | 0.89 | 0.17 |
| 43   |      | 46   |      | 183 |     | 129 |     | 10 (9)  |         | 6 (6)   |       | 5 (5)   |         | 4 (4)   |       | 0.22 |      | 0.17 |      |
| 44   | 39   | 45   | 29   | 177 | 164 | 137 | 88  | 7 (6)   | 8 (8)   | 7 (6)   | 4 (4) | 2 (2)   | 2 (2)   | 2 (2)   | 2 (2) | 1.59 | 1.59 | 1.59 | 0.61 |
| 45   | 48   | 55   | 51   | 176 | 101 | 102 | 45  | 10 (8)  | 4 (3)   | 7 (7)   | 2 (2) | 7 (6)   | 3 (2)   | 5 (5)   | 2 (2) | 0.62 | 0.17 | 0.49 | 0.17 |
| 46   | 43   | 49   | 31   | 176 | 138 | 119 | 84  | 10 (6)  | 7 (7)   | 5 (4)   | 3 (2) | 6 (4)   | 3 (3)   | 3 (2)   | 2 (1) | 0.32 | 0.32 | 0.15 | 0.07 |
| 47   | 34   | 43   | 18   | 173 | 197 | 149 | 156 | 8 (7)   | 12 (8)  | 10 (8)  | 9 (8) | 5 (5)   | 7 (5)   | 6 (5)   | 5 (5) | 0.06 | 0.06 | 0.06 | 0.06 |
| 48   |      | 42   |      | 172 |     | 152 |     | 8 (7)   |         | 6 (5)   |       | 5 (5)   |         | 3 (3)   |       | 0.55 |      | 0.3  |      |
| 49   | 87   | 79   |      | 165 | 34  | 57  |     | 12 (11) | 1 (1)   | 4 (3)   |       | 8 (7)   | 1 (1)   | 3 (2)   |       | 0.04 | 0.01 | 0.01 |      |
| 50.1 |      | 65.1 | 32.1 | 159 |     | 70  | 80  | 5 (5)   |         | 3 (3)   | 3 (3) | 2 (2)   |         | 2 (2)   | 2 (2) | 1.12 |      | 0.65 | 0.65 |
| 50.2 |      |      |      | 148 |     |     |     | 4 (4)   |         |         |       | 2 (2)   |         |         |       | 1.16 |      |      |      |
| 50.3 | 40.2 | 65.2 | 32.2 | 57  | 58  | 50  | 31  | 5 (3)   | 5 (4)   | 6 (3)   | 4 (2) | 2 (2)   | 2 (2)   | 2 (2)   | 2 (2) | 0.63 | 0.63 | 0.63 | 0.63 |
| 51   | 60   | 51   | 47   | 143 | 68  | 112 | 47  | 13 (9)  | 5 (5)   | 7 (7)   | 2 (2) | 8 (6)   | 3 (3)   | 5 (5)   | 2 (2) | 0.44 | 0.2  | 0.35 | 0.13 |
| 52   | 76   | 71   | 55   | 141 | 45  | 66  | 40  | 12 (12) | 10 (4)  | 8 (5)   | 6 (4) | 7 (7)   | 6 (4)   | 5 (4)   | 4 (3) | 0.23 | 0.11 | 0.11 | 0.08 |
| 53   | 129  | 54   |      | 130 | 26  | 105 |     | 7 (5)   | 3 (1)   | 6 (6)   |       | 4 (3)   | 2 (1)   | 3 (3)   |       | 0.28 | 0.09 | 0.28 |      |
| 54   | 50   | 41   |      | 126 | 79  | 161 |     | 8 (6)   | 3 (3)   | 6 (6)   |       | 4 (3)   | 2 (2)   | 3 (3)   |       | 0.26 | 0.17 | 0.26 |      |
| 55.1 | 4.1  | 5.14 | 3.5  | 122 | 113 | 52  | 46  | 6 (6)   | 6 (6)   | 3 (3)   | 3 (3) | 2 (2)   | 2 (2)   | 2 (2)   | 2 (2) | 1.14 | 1.14 | 0.66 | 0.66 |
| 55.2 | 4.14 | 5.13 | 3.4  | 69  | 68  | 66  | 57  | 4 (4)   | 4 (4)   | 4 (4)   | 3 (3) | 2 (2)   | 2 (2)   | 2 (2)   | 2 (2) | 0.61 | 0.61 | 0.61 | 0.61 |
| 56   | 44   | 53   | 23   | 117 | 137 | 107 | 130 | 8 (5)   | 6 (4)   | 7 (5)   | 5 (4) | 2 (2)   | 2 (2)   | 2 (2)   | 2 (1) | 1.14 | 0.66 | 1.14 | 0.66 |
| 57   | 56   | 75   |      | 117 | 71  | 63  |     | 10 (7)  | 5 (5)   | 7 (6)   |       | 7 (6)   | 3 (3)   | 5 (5)   |       | 0.19 | 0.09 | 0.16 |      |
| 58   | 49   | 35   | 17   | 115 | 86  | 208 | 169 | 4 (4)   | 3 (2)   | 6 (6)   | 6 (5) | 2 (2)   | 2 (1)   | 2 (2)   | 2 (2) | 0.74 | 0.32 | 1.29 | 1.29 |
| 59   | 88   | 95   |      | 115 | 34  | 39  |     | 5 (4)   | 3 (3)   | 3 (2)   |       | 3 (2)   | 2 (2)   | 2 (2)   |       | 0.14 | 0.14 | 0.14 |      |
| 60   | 57   | 59   | 43   | 113 | 70  | 85  | 59  | 2 (2)   | 1 (1)   | 2 (2)   | 1 (1) | 1 (1)   | 1 (1)   | 1 (1)   | 1 (1) | 0.04 | 0.04 | 0.04 | 0.04 |
| 61   |      |      |      | 112 |     |     |     | 7 (7)   |         |         |       | 5 (5)   |         |         |       | 0.18 |      |      |      |
| 62   |      | 70   |      | 95  |     | 66  |     | 6 (6)   |         | 6 (5)   |       | 4 (4)   |         | 3 (3)   |       | 0.2  |      | 0.15 |      |
| 63.1 | 45.1 | 47   | 42   | 95  | 117 | 127 | 59  | 5 (4)   | 5 (5)   | 5 (5)   | 4 (3) | 2 (2)   | 2 (2)   | 2 (2)   | 2 (2) | 0.96 | 0.96 | 0.96 | 0.57 |
| 63.2 | 45.2 |      |      | 59  | 94  |     |     | 2 (2)   | 5 (5)   |         |       | 2 (2)   | 2 (2)   |         |       | 0.6  | 0.6  |      |      |
| 64   | 69   | 56   |      | 93  | 52  | 98  |     | 2 (2)   | 2 (2)   | 2 (2)   |       | 1 (1)   | 1 (1)   | 1 (1)   |       | 0.29 | 0.29 | 0.29 |      |
| 65   | 155  | 74   |      | 91  | 23  | 64  |     | 8 (6)   | 3 (1)   | 5 (4)   |       | 5 (3)   | 2 (1)   | 4 (3)   |       | 0.23 | 0.05 | 0.17 |      |
| 66   | 47   | 58   | 30   | 85  | 109 | 93  | 85  | 3 (3)   | 7 (7)   | 3 (3)   | 6 (3) | 3 (3)   | 5 (5)   | 2 (2)   | 3 (3) | 0.23 | 0.42 | 0.15 | 0.23 |
| 67   | 172  | 73   | 98   | 84  | 22  | 65  | 25  | 6 (4)   | 4 (2)   | 5 (4)   | 1 (1) | 4 (3)   | 4 (2)   | 4 (4)   | 1 (1) | 0.2  | 0.13 | 0.27 | 0.06 |
| 68   | 59   | 62   | 33   | 81  | 69  | 79  | 83  | 8 (6)   | 7 (6)   | 7 (4)   | 8 (7) | 5 (4)   | 4 (3)   | 5 (3)   | 4 (4) | 0.43 | 0.31 | 0.31 | 0.43 |
| 69   | 73   | 111  |      | 80  | 46  | 34  |     | 5 (4)   | 3 (3)   | 2 (1)   |       | 3 (3)   | 3 (3)   | 2 (1)   |       | 0.07 | 0.07 | 0.02 |      |
| 70   | 68   | 66   |      | 80  | 55  | 72  |     | 2 (2)   | 1 (1)   | 1 (1)   |       | 1 (1)   | 1 (1)   | 1 (1)   |       | 0.25 | 0.25 | 0.25 |      |
| 71   | 37   | 36   | 19   | 75  | 170 | 192 | 146 | 6 (5)   | 10 (9)  | 9 (7)   | 8 (8) | 4 (3)   | 6 (6)   | 5 (4)   | 5 (5) | 0.04 | 0.08 | 0.05 | 0.07 |

|             |      |      |     |    |    |    |    |    |       |       |       |       |       |       |       |       |      |      |      |      |
|-------------|------|------|-----|----|----|----|----|----|-------|-------|-------|-------|-------|-------|-------|-------|------|------|------|------|
| IPI00922262 | 72   | 64   | 63  | 54 | 75 | 57 | 77 | 41 | 2 (2) | 2 (2) | 2 (1) | 2 (2) | 1 (1) | 1 (1) | 1 (1) | 1 (1) | 0.27 | 0.27 | 0.27 | 0.27 |
| IPI00019568 | 73   | 119  | 68  |    | 73 | 26 | 69 |    | 3 (3) | 1 (1) | 4 (4) |       | 2 (2) | 1 (1) | 2 (2) |       | 0.12 | 0.06 | 0.12 |      |
| IPI00879231 |      |      |     |    |    |    |    |    |       |       |       |       |       |       |       |       |      |      |      |      |
| IPI00028413 | 74.1 | 66.2 |     |    | 70 | 51 |    |    | 4 (4) | 4 (4) |       |       | 2 (2) | 2 (2) |       |       | 0.6  | 0.6  |      |      |
| IPI00294004 |      |      |     |    |    |    |    |    |       |       |       |       |       |       |       |       |      |      |      |      |
| IPI00022895 | 74.2 | 66.1 | 102 |    | 39 | 57 | 35 |    | 3 (3) | 4 (4) | 3 (3) |       | 2 (2) | 2 (2) | 2 (2) |       | 0.54 | 0.54 | 0.54 |      |
| IPI00218732 |      |      |     |    |    |    |    |    |       |       |       |       |       |       |       |       |      |      |      |      |
| IPI00410714 | 75   | 67   | 61  | 78 | 69 | 56 | 81 | 28 | 6 (4) | 4 (4) | 8 (6) | 2 (1) | 4 (3) | 3 (3) | 4 (3) | 1 (1) | 0.2  | 0.2  | 0.2  | 0.06 |
| IPI00022432 | 76   |      |     |    | 69 |    |    |    | 6 (5) |       |       |       | 3 (3) |       |       |       | 0.17 |      |      |      |
| IPI00977297 |      |      |     |    |    |    |    |    |       |       |       |       |       |       |       |       |      |      |      |      |
| IPI00022395 | 77   | 54   | 72  |    | 65 | 74 | 66 |    | 2 (2) | 2 (2) | 2 (2) |       | 1 (1) | 1 (1) | 1 (1) |       | 0.29 | 0.29 | 0.29 |      |
| IPI00022426 |      |      |     |    |    |    |    |    |       |       |       |       |       |       |       |       |      |      |      |      |
| IPI00296165 | 78   |      | 76  |    | 63 |    | 63 |    | 2 (2) |       | 2 (2) |       | 1 (1) |       | 1 (1) |       | 0.33 |      | 0.33 |      |
| IPI00387120 |      |      |     |    |    |    |    |    |       |       |       |       |       |       |       |       |      |      |      |      |
| IPI00025204 | 79   |      |     |    | 59 |    |    |    | 2 (2) |       |       |       | 1 (1) |       |       |       | 0.04 |      |      |      |
| IPI00186903 |      |      |     |    |    |    |    |    |       |       |       |       |       |       |       |       |      |      |      |      |
| IPI00398625 | 80   | 63   | 67  |    | 59 | 62 | 71 |    | 5 (4) | 4 (4) | 2 (2) |       | 3 (3) | 2 (2) | 1 (1) |       | 0.19 | 0.13 | 0.06 |      |
| IPI00021842 |      |      |     |    |    |    |    |    |       |       |       |       |       |       |       |       |      |      |      |      |
| IPI00242956 | 81   | 4.16 | 208 |    | 58 | 63 | 19 |    | 3 (1) | 4 (4) | 3 (1) |       | 2 (1) | 2 (2) | 2 (1) |       | 0.19 | 0.43 | 0.19 |      |
| IPI00387022 |      |      |     |    |    |    |    |    |       |       |       |       |       |       |       |       |      |      |      |      |
| IPI00387025 | 82   | 53   | 64  | 64 | 58 | 76 | 76 | 34 | 3 (3) | 6 (3) | 5 (4) | 4 (2) | 2 (2) | 3 (2) | 3 (2) | 2 (1) | 0.74 | 0.74 | 0.74 | 0.32 |
| IPI00387106 | 83   | 61   | 93  |    | 56 | 67 | 39 |    | 1 (1) | 3 (3) | 2 (1) |       | 1 (1) | 2 (2) | 1 (1) |       | 0.18 | 0.39 | 0.18 |      |
| IPI00291262 |      |      |     |    |    |    |    |    |       |       |       |       |       |       |       |       |      |      |      |      |
| IPI00017601 | 84   | 84   | 83  |    | 54 | 35 | 51 |    | 7 (4) | 2 (2) | 3 (2) |       | 4 (3) | 1 (1) | 2 (1) |       | 0.13 | 0.04 | 0.04 |      |
| IPI00552199 |      |      |     |    |    |    |    |    |       |       |       |       |       |       |       |       |      |      |      |      |
| IPI00029260 | 85   |      |     |    | 52 |    |    |    | 2 (2) |       |       |       | 1 (1) |       |       |       | 0.12 |      |      |      |
| IPI00384401 |      |      |     |    |    |    |    |    |       |       |       |       |       |       |       |       |      |      |      |      |
| IPI01026045 | 86   |      | 185 |    | 52 |    | 22 |    | 3 (3) |       | 1 (1) |       | 3 (3) |       | 1 (1) |       | 0.24 |      | 0.08 |      |
| IPI00387026 |      |      |     |    |    |    |    |    |       |       |       |       |       |       |       |       |      |      |      |      |
| IPI00879709 | 87   |      | 94  |    | 51 |    | 39 |    | 3 (3) |       | 2 (2) |       | 1 (1) |       | 1 (1) |       | 0.26 |      | 0.26 |      |
| IPI00021857 |      |      |     |    |    |    |    |    |       |       |       |       |       |       |       |       |      |      |      |      |
| IPI00022331 | 88   | 58   | 99  | 65 | 49 | 70 | 37 | 32 | 2 (2) | 2 (2) | 2 (1) | 1 (1) | 1 (1) | 1 (1) | 1 (1) | 1 (1) | 0.05 | 0.05 | 0.05 | 0.05 |
| IPI00071509 | 89   | 150  | 108 |    | 48 | 24 | 35 |    | 2 (2) | 1 (1) | 2 (2) |       | 1 (1) | 1 (1) | 1 (1) |       | 0.04 | 0.04 | 0.04 |      |
| IPI00296608 |      |      |     |    |    |    |    |    |       |       |       |       |       |       |       |       |      |      |      |      |
| IPI00021727 | 90   | 52   | 88  | 68 | 47 | 77 | 45 | 31 | 3 (3) | 3 (3) | 2 (2) | 2 (1) | 1 (1) | 1 (1) | 1 (1) | 1 (1) | 0.69 | 0.69 | 0.3  | 0.3  |

IPI00783287  
IPI00382500  
IPI00003470  
IPI00479116  
IPI00166205  
IPI00032179  
IPI00219616  
IPI00019591  
IPI00384407  
IPI00397801  
IPI00735451  
IPI00291866  
IPI00816799  
IPI00549330  
IPI00022488  
IPI00163207  
IPI00385555  
IPI00383603  
IPI00012792  
IPI00009793  
IPI00981476  
IPI00007047  
IPI00985211  
IPI00017696  
IPI00215983  
IPI00023019  
IPI00854743  
IPI00019943  
IPI00026314  
IPI00976928



|             |     |      |     |     |    |    |       |       |       |       |       |       |       |       |       |       |       |       |      |      |
|-------------|-----|------|-----|-----|----|----|-------|-------|-------|-------|-------|-------|-------|-------|-------|-------|-------|-------|------|------|
| IPI00022420 | 156 | 157  | 154 | 24  | 23 | 24 | 1 (1) | 2 (1) | 1 (1) | 1 (1) | 1 (1) | 1 (1) | 1 (1) | 1 (1) | 0.14  | 0.14  | 0.14  |       |      |      |
| IPI00000274 | 157 |      |     | 24  |    |    | 1 (1) |       |       |       |       |       |       |       | 0.06  |       |       |       |      |      |
| IPI00103902 | 158 | 102  | 128 | 24  | 29 | 27 | 1 (1) | 2 (1) | 2 (1) |       |       | 1 (1) | 1 (1) |       | 0.21  | 0.21  | 0.21  |       |      |      |
| IPI00396185 | 159 |      |     | 24  |    |    | 1 (1) |       |       |       |       |       |       |       | 0.04  |       |       |       |      |      |
| IPI00892773 | 160 |      |     | 24  |    |    | 1 (1) |       |       |       |       |       |       |       | 0.97  |       |       |       |      |      |
| IPI00064262 | 161 |      |     | 24  |    |    | 1 (1) |       |       |       |       |       |       |       | 0.01  |       |       |       |      |      |
| IPI00477733 | 162 |      |     | 24  |    |    | 1 (1) |       |       |       |       |       |       |       | 0.07  |       |       |       |      |      |
| IPI00398872 | 163 |      |     | 24  |    |    | 1 (1) |       |       |       |       |       |       |       | 0.05  |       |       |       |      |      |
| IPI00021856 | 164 |      | 63  | 24  |    | 34 | 3 (1) |       |       | 4 (2) |       |       |       | 3 (2) | 0.3   |       |       | 0.7   |      |      |
| IPI00019452 | 165 |      |     | 24  |    |    | 1 (1) |       |       |       |       |       |       |       | 0.07  |       |       |       |      |      |
| IPI00024657 | 166 |      |     | 23  |    |    | 1 (1) |       |       |       |       |       |       |       | 0.11  |       |       |       |      |      |
| IPI00021536 | 167 | 196  | 160 | 88  | 23 | 24 | 27    | 1 (1) | 1 (1) | 1 (1) | 2 (2) | 1 (1) | 1 (1) | 1 (1) | 0.21  | 0.21  | 0.21  | 0.21  |      |      |
| IPI00873421 | 168 |      |     | 23  |    |    | 1 (1) |       |       |       |       |       |       |       | 0.04  |       |       |       |      |      |
| IPI01025318 | 169 | 121  | 168 | 123 | 23 | 26 | 23    | 22    | 2 (2) | 2 (2) | 3 (3) | 1 (1) | 1 (1) | 1 (1) | 1.93  | 1.93  | 1.93  | 1.93  |      |      |
| IPI00293558 | 170 | 122  |     | 23  | 26 |    | 1 (1) |       | 3 (1) |       |       |       | 1 (1) | 1 (1) | 0.03  | 0.03  |       |       |      |      |
| IPI00398836 | 171 |      |     | 23  |    |    | 1 (1) |       |       |       |       |       |       |       | 0.06  |       |       |       |      |      |
| IPI00436526 | 172 |      |     | 22  |    |    | 1 (1) |       |       |       |       |       |       |       | 0.07  |       |       |       |      |      |
| IPI00017567 | 173 |      |     | 22  |    |    | 1 (1) |       |       |       |       |       |       |       | 0.05  |       |       |       |      |      |
| IPI00024046 | 174 |      |     | 22  |    |    | 1 (1) |       |       |       |       |       |       |       | 0.04  |       |       |       |      |      |
| IPI00296114 | 175 |      |     | 22  |    |    | 1 (1) |       |       |       |       |       |       |       | 0.06  |       |       |       |      |      |
| IPI00167773 | 176 |      |     | 22  |    |    | 1 (1) |       |       |       |       |       |       |       | 0.06  |       |       |       |      |      |
| IPI00026580 | 177 |      | 203 | 22  |    | 21 | 2 (1) |       |       | 1 (1) |       |       |       | 1 (1) | 0.03  |       | 0.03  |       |      |      |
| IPI00019447 | 178 |      |     | 22  |    |    | 1 (1) |       |       |       |       |       |       |       | 0.02  |       |       |       |      |      |
| IPI00966277 | 179 |      |     | 22  |    |    | 1 (1) |       |       |       |       |       |       |       | 0.15  |       |       |       |      |      |
| IPI00021854 | 180 | 110  | 85  | 25  | 22 | 28 | 47    | 103   | 2 (1) | 3 (1) | 6 (3) | 6 (6) | 2 (1) | 3 (1) | 2 (2) | 3 (3) | 0.3   | 0.3   | 0.7  | 1.89 |
| IPI00296043 | 181 |      |     | 22  |    |    | 1 (1) |       |       |       |       |       |       |       | 0.07  |       |       |       |      |      |
| IPI00913887 | 182 |      |     | 21  |    |    | 1 (1) |       |       |       |       |       |       |       | 0.13  |       |       |       |      |      |
| IPI00018278 | 183 |      | 138 | 21  |    | 27 | 1 (1) |       |       | 1 (1) |       |       |       |       | 0.25  |       | 0.25  |       |      |      |
| IPI00984723 | 184 |      |     | 21  |    |    | 1 (1) |       |       |       |       |       |       |       | 0.18  |       |       |       |      |      |
| IPI01022978 | 185 |      |     | 21  |    |    | 1 (1) |       |       |       |       |       |       |       | 0.22  |       |       |       |      |      |
| IPI00064667 | 186 |      |     | 21  |    |    | 1 (1) |       |       |       |       |       |       |       | 0.06  |       |       |       |      |      |
| IPI00872707 | 187 |      | 179 | 21  |    | 21 | 1 (1) |       | 1 (1) |       |       |       |       | 1 (1) | 0.02  | 0.02  |       |       |      |      |
| IPI00854887 | 188 |      |     | 21  |    |    | 1 (1) |       |       |       |       |       |       |       | 0.06  |       |       |       |      |      |
| IPI00168209 | 189 |      |     | 21  |    |    | 1 (1) |       |       |       |       |       |       |       | 0.1   |       |       |       |      |      |
| IPI00979799 | 190 |      |     | 20  |    |    | 1 (1) |       |       |       |       |       |       |       | 0.21  |       |       |       |      |      |
| IPI00793638 | 191 |      |     | 20  |    |    | 1 (1) |       |       |       |       |       |       |       | 0.05  |       |       |       |      |      |
| IPI00291783 | 192 |      |     | 20  |    |    | 1 (1) |       |       |       |       |       |       |       | 0.02  |       |       |       |      |      |
| IPI00027462 | 193 | 82   | 77  | 146 | 20 | 38 | 59    | 19    | 2 (1) | 4 (2) | 2 (2) | 4 (1) | 2 (1) | 3 (1) | 1 (1) | 3 (1) | 0.26  | 0.26  | 0.26 | 0.26 |
| IPI00827965 | 194 |      |     | 20  |    |    | 1 (1) |       |       |       |       |       |       |       | 0.27  |       |       |       |      |      |
| IPI00514908 | 195 |      | 119 | 61  | 20 |    | 29    | 36    | 3 (1) |       | 2 (2) | 1 (1) | 3 (1) |       | 1 (1) | 1 (1) | 0.05  |       | 0.05 | 0.05 |
| IPI00976183 | 196 | 4.17 | 136 |     | 20 | 28 | 27    |       | 4 (1) | 3 (3) | 3 (1) |       | 2 (1) | 2 (2) | 2 (1) |       | 0.25  | 0.56  | 0.25 |      |
| IPI00178359 | 197 |      |     | 20  |    |    | 1 (1) |       |       |       |       |       |       |       | 0.17  |       |       |       |      |      |
| IPI00006288 | 198 |      |     | 20  |    |    | 1 (1) |       |       |       |       |       |       |       | 0.02  |       |       |       |      |      |
| IPI00794900 | 199 |      |     | 20  |    |    | 1 (1) |       |       |       |       |       |       |       | 0.03  |       |       |       |      |      |
| IPI00976611 | 200 |      |     | 20  |    |    | 1 (1) |       |       |       |       |       |       |       | 0.26  |       |       |       |      |      |
| IPI00009101 | 201 |      |     | 20  |    |    | 1 (1) |       |       |       |       |       |       |       | 0.01  |       |       |       |      |      |
| IPI00250716 | 202 |      |     | 20  |    |    | 1 (1) |       |       |       |       |       |       |       | 0.01  |       |       |       |      |      |
| IPI00884998 | 203 |      |     | 20  |    |    | 1 (1) |       |       |       |       |       |       |       | 0.12  |       |       |       |      |      |
| IPI00376229 | 204 |      |     | 20  |    |    | 1 (1) |       |       |       |       |       |       |       | 0.03  |       |       |       |      |      |
| IPI00903188 | 205 |      |     | 20  |    |    | 1 (1) |       |       |       |       |       |       |       | 0.15  |       |       |       |      |      |
| IPI00152643 | 206 |      |     | 19  |    |    | 1 (1) |       |       |       |       |       |       |       | 0.05  |       |       |       |      |      |
| IPI00418570 | 207 |      | 211 |     | 19 |    | 19    |       | 2 (1) |       | 1 (1) |       |       |       | 1 (1) |       | 0.05  |       | 0.05 |      |
| IPI00163187 | 208 |      |     | 19  |    |    | 1 (1) |       |       |       |       |       |       |       | 0.06  |       |       |       |      |      |
| IPI00145799 | 209 |      |     | 19  |    |    | 1 (1) |       |       |       |       |       |       |       | 0.05  |       |       |       |      |      |
| IPI01026445 |     |      | 126 |     |    |    | 28    | 167   |       |       | 1 (1) |       |       |       |       |       | 1 (1) |       | 0.06 |      |
| IPI01025882 |     |      |     | 3.2 |    |    |       |       |       | 7 (7) |       |       |       |       |       |       |       | 4 (4) |      | 1.79 |
| IPI01025809 | 135 |      |     |     |    | 25 |       |       |       | 1 (1) |       |       |       |       | 1 (1) |       |       |       | 0.14 |      |
| IPI01024994 | 86  |      |     |     |    | 34 |       |       |       | 1 (1) |       |       |       |       | 1 (1) |       |       |       | 0.31 |      |
| IPI01022717 |     |      |     | 91  |    |    |       | 26    |       |       | 1 (1) |       |       |       |       |       | 1 (1) |       |      | 0.16 |
| IPI01022490 | 194 |      |     |     |    | 20 |       |       |       | 1 (1) |       |       |       |       | 1 (1) |       |       |       | 0.36 |      |
| IPI01018262 | 134 |      |     |     |    | 25 |       |       |       | 1 (1) |       |       |       |       | 1 (1) |       |       |       | 0.11 |      |
| IPI01015420 |     |      | 171 |     |    |    | 23    |       |       |       | 1 (1) |       |       |       |       |       | 1 (1) |       |      | 0.14 |
| IPI01014624 | 183 |      |     |     |    | 21 |       |       |       | 1 (1) |       |       |       |       | 1 (1) |       |       |       | 0.02 |      |
| IPI01010871 |     |      |     | 100 |    |    |       | 25    |       |       | 1 (1) |       |       |       |       |       | 1 (1) |       |      | 0.09 |
| IPI00983315 | 114 |      |     |     |    | 27 |       |       |       | 1 (1) |       |       |       |       | 1 (1) |       |       |       | 0.17 |      |

|             |      |     |      |      |    |    |         |       |       |       |       |       |      |      |      |
|-------------|------|-----|------|------|----|----|---------|-------|-------|-------|-------|-------|------|------|------|
| IPI00982082 | 186  |     |      | 21   |    |    | 1 (1)   |       |       | 1 (1) |       |       | 0.17 |      |      |
| IPI00981657 | 133  |     |      | 25   |    |    | 1 (1)   |       |       | 1 (1) |       |       | 0.48 |      |      |
| IPI00981631 |      |     | 75   |      |    | 29 |         |       | 1 (1) |       | 1 (1) |       |      |      | 0.55 |
| IPI00980647 |      |     | 94   |      |    | 25 |         |       | 2 (1) |       | 1 (1) |       |      |      | 0.02 |
| IPI00980615 |      | 122 |      |      | 28 |    |         | 1 (1) |       |       | 1 (1) |       |      | 0.22 |      |
| IPI00980520 |      | 144 | 60   |      | 26 | 36 |         | 3 (2) |       |       | 1 (1) |       |      | 0.22 | 0.22 |
| IPI00980286 |      | 100 |      |      | 37 |    |         | 3 (3) |       |       | 2 (2) |       |      | 0.64 |      |
| IPI00979407 | 177  |     |      | 21   |    |    | 1 (1)   |       |       | 1 (1) |       |       | 1.27 |      |      |
| IPI00979250 | 4.2  |     |      | 1255 |    |    | 46 (43) |       |       | 8 (8) |       |       | 4.47 |      |      |
| IPI00978151 | 130  |     |      | 26   |    |    | 1 (1)   |       |       | 1 (1) |       |       | 0.15 |      |      |
| IPI00967352 |      |     | 77   |      |    | 28 |         |       |       |       |       | 1 (1) |      |      | 0.16 |
| IPI00967278 |      | 162 |      |      | 24 |    |         | 1 (1) |       |       | 1 (1) |       |      | 0.01 |      |
| IPI00966812 | 145  |     |      | 24   |    |    | 2 (1)   |       |       | 1 (1) |       |       | 0.48 |      |      |
| IPI00946796 | 144  |     |      | 24   |    |    | 1 (1)   |       |       | 1 (1) |       |       | 0.35 |      |      |
| IPI00945573 |      |     | 95   |      |    | 25 |         |       |       |       |       | 1 (1) |      |      | 0.39 |
| IPI00930680 | 190  |     |      | 20   |    |    | 1 (1)   |       |       | 1 (1) |       |       | 0.04 |      |      |
| IPI00926555 |      | 142 |      |      | 26 |    |         | 1 (1) |       |       | 1 (1) |       |      | 0.58 |      |
| IPI00925811 |      |     | 121  |      |    | 22 |         |       |       |       |       | 1 (1) |      |      | 0.4  |
| IPI00925570 |      | 176 |      |      | 23 |    |         | 1 (1) |       |       | 1 (1) |       |      | 0.2  |      |
| IPI00925273 |      | 143 | 71   |      | 26 | 30 |         | 3 (1) |       | 4 (1) | 1 (1) |       |      | 0.75 | 0.75 |
| IPI00924556 | 170  |     |      | 22   |    |    | 1 (1)   |       |       | 1 (1) |       |       | 0.18 |      |      |
| IPI00921105 |      | 201 |      |      | 21 |    |         | 2 (1) |       |       | 1 (1) |       |      | 0.27 |      |
| IPI00921032 |      |     | 108  |      |    | 23 |         |       |       |       |       | 1 (1) |      |      | 0.27 |
| IPI00917042 | 169  |     |      | 22   |    |    | 1 (1)   |       |       | 1 (1) |       |       | 0.11 |      |      |
| IPI00916926 | 115  |     |      | 27   |    |    | 1 (1)   |       |       | 1 (1) |       |       | 0.27 |      |      |
| IPI00909613 |      |     | 109  |      |    | 23 |         |       |       |       |       | 1 (1) |      |      | 0.02 |
| IPI00909403 |      | 172 |      |      | 23 |    |         | 1 (1) |       |       | 1 (1) |       |      | 0.08 |      |
| IPI00908739 |      |     | 97   |      |    | 25 |         |       |       |       |       | 1 (1) |      |      | 0.24 |
| IPI00908593 | 101  |     |      | 29   |    |    | 2 (1)   |       |       | 2 (1) |       |       | 0.2  |      |      |
| IPI00893529 | 151  | 110 |      | 23   | 34 |    | 1 (1)   |       | 3 (2) |       | 2 (1) |       | 0.32 | 0.32 |      |
| IPI00893043 | 161  |     |      | 23   |    |    | 1 (1)   |       |       | 1 (1) |       |       | 0.15 |      |      |
| IPI00892760 |      |     | 90   |      |    | 26 |         |       |       |       |       | 1 (1) |      |      | 1.39 |
| IPI00887929 | 153  |     |      | 23   |    |    | 1 (1)   |       |       | 1 (1) |       |       | 0.23 |      |      |
| IPI00884092 |      | 133 |      |      | 27 |    |         | 1 (1) |       |       | 1 (1) |       |      | 0.13 |      |
| IPI00871968 |      |     | 104  |      |    | 24 |         |       |       |       |       | 1 (1) |      |      | 0.03 |
| IPI00868677 |      | 134 |      |      | 27 |    |         | 1 (1) |       |       | 1 (1) |       |      | 0.19 |      |
| IPI00856012 | 138  |     |      | 25   |    |    | 1 (1)   |       |       | 1 (1) |       |       | 0.01 |      |      |
| IPI00854787 |      | 209 |      |      | 19 |    |         | 1 (1) |       |       | 1 (1) |       |      | 0.26 |      |
| IPI00828004 |      |     | 135  |      |    | 21 |         |       |       |       |       | 1 (1) |      |      | 0.12 |
| IPI00827643 | 51   | 69  |      | 79   | 67 |    | 2 (2)   |       | 2 (2) |       | 1 (1) |       | 0.27 | 0.27 |      |
| IPI00796842 | 176  |     |      | 21   |    |    | 1 (1)   |       |       | 1 (1) |       |       | 0.11 |      |      |
| IPI00794798 |      |     | 131  |      |    | 21 |         |       |       |       |       | 1 (1) |      |      | 0.02 |
| IPI00784201 |      | 139 |      |      | 26 |    |         | 2 (1) |       |       | 2 (1) |       |      | 0.01 |      |
| IPI00783859 | 185  |     |      | 21   |    |    | 1 (1)   |       |       | 1 (1) |       |       | 0.01 |      |      |
| IPI00783024 | 4.12 |     |      | 94   |    |    | 9 (6)   |       |       | 3 (2) |       |       | 0.91 |      |      |
| IPI00749329 |      | 197 |      |      | 21 |    |         | 1 (1) |       |       | 1 (1) |       |      | 0.11 |      |
| IPI00748303 |      | 131 |      |      | 27 |    |         | 1 (1) |       |       | 1 (1) |       |      | 0.03 |      |
| IPI00748265 | 81   |     |      | 38   |    |    | 1 (1)   |       |       | 1 (1) |       |       | 0.26 |      |      |
| IPI00747470 |      |     | 107  |      |    | 24 |         |       |       |       |       | 2 (1) |      |      | 0.02 |
| IPI00742191 | 140  |     |      | 25   |    |    | 1 (1)   |       |       | 1 (1) |       |       | 0.08 |      |      |
| IPI00736885 |      | 5.9 |      |      | 95 |    |         | 3 (3) |       |       | 2 (2) |       |      | 0.63 |      |
| IPI00736155 |      | 158 |      |      | 24 |    |         | 1 (1) |       |       | 1 (1) |       |      | 0.05 |      |
| IPI00657966 | 126  |     |      | 26   |    |    | 1 (1)   |       |       | 1 (1) |       |       | 0.12 |      |      |
| IPI00654552 | 148  |     |      | 24   |    |    | 2 (1)   |       |       | 2 (1) |       |       | 0.02 |      |      |
| IPI00651755 | 112  |     |      | 27   |    |    | 1 (1)   |       |       | 1 (1) |       |       | 0.45 |      |      |
| IPI00646409 |      | 140 |      |      | 26 |    |         | 1 (1) |       |       | 1 (1) |       |      | 0.03 |      |
| IPI00645570 |      | 199 |      |      | 21 |    |         | 1 (1) |       |       | 1 (1) |       |      | 0.02 |      |
| IPI00642244 |      | 165 |      |      | 24 |    |         | 1 (1) |       |       | 1 (1) |       |      | 0.03 |      |
| IPI00641229 |      |     | 24.2 |      |    | 51 |         |       |       |       |       | 4 (3) |      |      | 0.29 |
| IPI00554788 | 3.7  |     |      | 52   |    |    | 5 (5)   |       |       | 2 (2) |       |       | 0.14 |      |      |
| IPI00552042 |      | 124 |      |      | 28 |    |         | 1 (1) |       |       | 1 (1) |       |      | 0.1  |      |
| IPI00551059 | 142  |     |      | 24   |    |    | 1 (1)   |       |       | 1 (1) |       |       | 0.09 |      |      |
| IPI00551024 | 178  |     |      | 21   |    |    | 3 (1)   |       |       | 2 (1) |       |       | 0.06 |      |      |
| IPI00550991 |      |     | 128  |      |    | 21 |         |       |       |       |       | 1 (1) |      |      | 0.14 |
| IPI00514832 |      |     | 110  |      |    | 23 |         |       |       |       |       | 1 (1) |      |      | 0.04 |

|             |      |     |     |     |     |    |       |         |       |       |       |      |      |      |  |      |
|-------------|------|-----|-----|-----|-----|----|-------|---------|-------|-------|-------|------|------|------|--|------|
| IPI00514529 | 173  |     |     | 22  |     |    | 1 (1) |         |       | 1 (1) |       | 0.15 |      |      |  |      |
| IPI00479930 | 154  | 152 |     | 23  | 25  |    | 2 (1) | 2 (2)   |       | 1 (1) | 1 (1) | 0.1  | 0.1  |      |  | 0.03 |
| IPI00478916 |      |     | 137 |     |     | 21 |       |         | 1 (1) |       | 1 (1) |      |      |      |  |      |
| IPI00478085 |      | 205 |     |     | 20  |    |       | 1 (1)   |       |       | 1 (1) |      | 0.05 |      |  |      |
| IPI00477799 |      | 182 |     |     | 22  |    |       | 1 (1)   |       |       | 1 (1) |      | 0.04 |      |  |      |
| IPI00470805 |      |     | 81  |     |     | 28 |       |         | 1 (1) |       |       |      |      |      |  | 0.02 |
| IPI00464978 | 92   |     |     | 32  |     |    | 1 (1) |         |       | 1 (1) |       | 0.02 |      |      |  |      |
| IPI00453473 | 79   | 117 |     | 42  | 30  |    | 3 (2) | 1 (1)   |       | 2 (2) | 1 (1) | 0.7  | 0.3  |      |  |      |
| IPI00446573 | 139  |     |     | 25  |     |    | 1 (1) |         |       | 1 (1) |       | 0.25 |      |      |  |      |
| IPI00444237 |      |     | 102 |     |     | 25 |       |         | 2 (1) |       |       |      |      |      |  | 0.03 |
| IPI00443415 | 116  |     |     | 27  |     |    | 1 (1) |         |       | 1 (1) |       | 0.03 |      |      |  |      |
| IPI00433420 |      |     | 139 |     |     | 20 |       |         | 2 (1) |       |       |      |      |      |  | 0.12 |
| IPI00419204 |      |     | 114 |     |     | 23 |       |         | 1 (1) |       |       |      |      |      |  | 0.03 |
| IPI00415054 |      | 174 |     |     | 23  |    |       | 1 (1)   |       |       | 1 (1) |      | 0.02 |      |  |      |
| IPI00414367 |      |     | 86  |     |     | 27 |       |         | 2 (1) |       |       |      |      |      |  | 0.02 |
| IPI00413100 |      |     | 93  |     |     | 25 |       |         | 1 (1) |       |       |      |      |      |  | 0.02 |
| IPI00412405 |      | 170 |     |     | 23  |    |       | 1 (1)   |       |       | 1 (1) |      | 0.07 |      |  |      |
| IPI00399411 |      |     | 87  |     |     | 27 |       |         | 1 (1) |       |       |      |      |      |  | 0.03 |
| IPI00398220 | 40.1 |     |     | 143 |     |    | 4 (4) |         |       | 2 (2) |       | 1.14 |      |      |  |      |
| IPI00398090 | 174  |     |     | 22  |     |    | 1 (1) |         |       | 1 (1) |       | 0.06 |      |      |  |      |
| IPI00398029 |      | 190 |     |     | 22  |    |       | 1 (1)   |       |       | 1 (1) |      | 0.07 |      |  |      |
| IPI00396485 | 97   |     |     | 30  |     |    | 2 (2) |         |       | 1 (1) |       | 0.07 |      |      |  |      |
| IPI00396406 |      |     | 130 |     |     | 21 |       |         | 1 (1) |       |       |      |      |      |  | 0.07 |
| IPI00396279 | 132  |     |     | 25  |     |    | 1 (1) |         |       | 1 (1) |       | 0.02 |      |      |  |      |
| IPI00394851 | 152  |     |     | 23  |     |    | 1 (1) |         |       | 1 (1) |       | 0.08 |      |      |  |      |
| IPI00394718 | 107  |     |     | 28  |     |    | 2 (1) |         |       | 2 (1) |       | 0.01 |      |      |  |      |
| IPI00386391 |      | 166 |     |     | 23  |    |       | 1 (1)   |       |       | 1 (1) |      | 0.09 |      |  |      |
| IPI00385612 | 165  |     |     | 22  |     |    | 1 (1) |         |       | 1 (1) |       | 0.04 |      |      |  |      |
| IPI00384791 |      | 116 | 101 |     | 31  | 25 |       | 1 (1)   | 1 (1) | 1 (1) |       |      | 0.04 | 0.04 |  | 0.04 |
| IPI00384122 | 105  |     |     | 28  |     |    | 1 (1) |         |       | 1 (1) |       | 0.08 |      |      |  |      |
| IPI00382534 | 99   |     |     | 29  |     |    | 2 (1) |         |       | 1 (1) |       | 0.24 |      |      |  |      |
| IPI00382440 | 175  | 104 |     | 22  | 36  |    | 2 (1) | 1 (1)   |       | 1 (1) | 1 (1) | 0.3  | 0.3  |      |  |      |
| IPI00376941 | 201  | 191 | 122 | 19  | 22  | 22 | 1 (1) | 1 (1)   | 2 (1) | 1 (1) | 1 (1) | 0.03 | 0.03 |      |  | 0.03 |
| IPI00375843 | 1.7  |     |     | 57  |     |    | 3 (3) |         |       | 2 (2) |       | 0.12 |      |      |  |      |
| IPI00375294 |      | 189 |     |     | 22  |    |       | 1 (1)   |       |       | 1 (1) |      | 0.01 |      |  |      |
| IPI00334599 |      |     | 76  |     |     | 28 |       |         | 1 (1) |       |       |      |      |      |  | 0.08 |
| IPI00329548 | 147  |     |     | 24  |     |    | 1 (1) |         |       | 1 (1) |       | 0.07 |      |      |  |      |
| IPI00307259 |      | 157 |     |     | 24  |    |       | 1 (1)   |       |       | 1 (1) |      | 0.01 |      |  |      |
| IPI00305589 |      |     | 124 |     |     | 22 |       |         | 1 (1) |       |       |      |      |      |  | 0.06 |
| IPI00304885 | 171  |     |     | 22  |     |    | 1 (1) |         |       | 1 (1) |       | 0.03 |      |      |  |      |
| IPI00304589 | 160  |     |     | 23  |     |    | 1 (1) |         |       | 1 (1) |       | 0.02 |      |      |  |      |
| IPI00302368 | 182  |     |     | 21  |     |    | 1 (1) |         |       | 1 (1) |       | 0.09 |      |      |  |      |
| IPI00301987 | 118  |     |     | 26  |     |    | 1 (1) |         |       | 1 (1) |       | 0.03 |      |      |  |      |
| IPI00299890 |      | 153 |     |     | 24  |    |       | 1 (1)   |       |       | 1 (1) |      | 0.03 | 0.03 |  |      |
| IPI00299584 |      | 118 |     |     | 30  |    |       | 1 (1)   |       |       | 1 (1) |      | 0.06 |      |  |      |
| IPI00299094 | 123  |     |     | 26  |     |    | 1 (1) |         |       | 1 (1) |       | 0.03 |      |      |  |      |
| IPI00299063 | 158  |     |     | 23  |     |    | 1 (1) |         |       | 1 (1) |       | 0.04 |      |      |  |      |
| IPI00298860 |      | 37  |     |     | 185 |    |       | 11 (11) |       |       | 6 (6) |      | 0.32 |      |  |      |
| IPI00296536 | 95   |     |     | 31  |     |    | 1 (1) |         |       | 1 (1) |       | 0.1  |      |      |  |      |
| IPI00296485 |      |     | 106 |     |     | 24 |       |         | 1 (1) |       |       |      |      |      |  | 0.03 |
| IPI00296183 |      | 175 |     |     | 23  |    |       | 1 (1)   |       |       | 1 (1) |      | 0.06 |      |  |      |
| IPI00295772 | 89   |     |     | 34  |     |    | 1 (1) |         |       | 1 (1) |       | 0.06 |      |      |  |      |
| IPI00293654 |      | 207 |     |     | 20  |    |       | 3 (1)   |       |       | 2 (1) |      | 0.05 |      |  |      |
| IPI00292012 |      | 202 |     |     | 21  |    |       | 1 (1)   |       |       | 1 (1) |      | 0.02 |      |  |      |
| IPI00290077 |      | 4.7 |     |     | 278 |    |       | 18 (17) |       |       | 8 (8) |      | 0.79 |      |  |      |
| IPI00289799 |      |     |     | 28  |     |    | 1 (1) |         |       | 1 (1) |       | 0.03 |      |      |  |      |
| IPI00248639 |      | 196 |     |     | 21  |    |       | 2 (1)   |       |       | 2 (1) |      | 0.03 | 0.03 |  |      |
| IPI00242630 |      | 180 |     |     | 23  |    |       | 1 (1)   |       |       | 1 (1) |      | 0.03 |      |  |      |
| IPI00219476 |      |     |     | 23  |     |    | 1 (1) |         |       | 1 (1) |       | 0.07 |      |      |  |      |
| IPI00219315 |      |     | 82  |     |     | 28 |       |         | 7 (1) |       |       |      |      |      |  | 0.03 |
| IPI00219035 |      |     | 116 |     |     | 22 |       |         | 1 (1) |       |       |      |      |      |  | 0.14 |
| IPI00219018 |      |     | 73  |     |     | 29 |       |         | 1 (1) |       |       |      |      |      |  | 0.09 |
| IPI00218918 |      | 106 |     |     | 35  |    |       | 2 (2)   |       |       | 2 (2) |      | 0.18 |      |  |      |
| IPI00218824 | 180  |     |     | 21  |     |    | 1 (1) |         |       | 1 (1) |       | 0.03 |      |      |  |      |
| IPI00218658 |      | 181 |     |     | 23  |    |       | 1 (1)   |       |       | 1 (1) |      | 0.01 |      |  |      |



|             |     |      |      |     |     |  |       |         |         |       |       |       |      |      |
|-------------|-----|------|------|-----|-----|--|-------|---------|---------|-------|-------|-------|------|------|
| IPI00218474 | 202 |      |      | 19  |     |  | 1 (1) |         |         | 1 (1) |       | 0.07  |      |      |
| IPI00217756 |     | 148  |      | 25  |     |  | 1 (1) | 1 (1)   |         | 1 (1) | 1 (1) |       | 0.08 |      |
| IPI00217232 |     | 130  | 111  | 27  | 23  |  |       | 1 (1)   |         | 1 (1) | 1 (1) |       | 0.07 | 0.07 |
| IPI00216654 | 198 |      |      | 20  |     |  | 1 (1) |         |         | 1 (1) |       | 0.04  |      |      |
| IPI00216560 | 189 |      |      | 20  |     |  | 2 (1) |         |         | 2 (1) |       | 0.01  |      |      |
| IPI00215899 |     | 167  |      | 23  |     |  |       | 3 (1)   |         | 1 (1) |       |       | 0.06 |      |
| IPI00184533 | 124 | 163  |      | 24  | 27  |  | 1 (1) | 1 (1)   |         | 1 (1) |       | 0.03  | 0.03 |      |
| IPI00183280 |     |      | 84   |     |     |  |       |         |         |       | 2 (2) |       |      | 0.04 |
| IPI00182438 |     | 113  |      | 32  |     |  |       | 1 (1)   |         | 1 (1) |       |       | 0.03 |      |
| IPI00181824 |     | 210  |      | 19  |     |  |       | 1 (1)   |         | 1 (1) |       |       | 0.04 |      |
| IPI00181265 | 164 |      |      | 22  |     |  | 1 (1) |         |         | 1 (1) |       | 0.04  |      |      |
| IPI00179330 |     | 194  | 66   | 21  | 31  |  |       | 1 (1)   | 1 (1)   | 1 (1) | 1 (1) |       | 0.18 | 0.18 |
| IPI00176193 |     | 186  |      | 22  |     |  |       | 1 (1)   |         | 1 (1) |       |       | 0.02 |      |
| IPI00169239 | 103 |      |      | 28  |     |  | 2 (2) |         |         | 1 (1) |       | 0.02  | 0.17 |      |
| IPI00168718 |     | 198  |      | 21  |     |  |       | 1 (1)   |         | 1 (1) |       |       |      | 0.05 |
| IPI00167943 |     |      | 105  |     | 24  |  |       |         |         |       | 1 (1) |       |      |      |
| IPI00167696 | 191 |      |      | 20  |     |  | 1 (1) |         |         | 1 (1) |       | 0.11  |      |      |
| IPI00167014 |     | 212  |      | 19  |     |  |       | 1 (1)   |         | 1 (1) |       |       | 0.14 |      |
| IPI00166729 | 100 | 103  | 70   | 29  | 30  |  | 3 (1) | 3 (2)   | 1 (1)   | 3 (1) | 2 (2) | 1 (1) | 0.1  | 0.1  |
| IPI00166060 |     | 187  |      | 22  |     |  |       | 1 (1)   |         |       | 1 (1) |       | 0.05 |      |
| IPI00165970 |     | 179  |      | 23  |     |  |       | 1 (1)   |         |       | 1 (1) |       | 0.04 |      |
| IPI00164352 |     |      | 72   |     | 30  |  |       |         | 1 (1)   |       |       | 1 (1) |      | 0.01 |
| IPI00156984 |     | 206  |      | 20  |     |  |       | 1 (1)   |         |       | 1 (1) |       | 0.15 |      |
| IPI00156933 | 167 |      |      | 22  |     |  | 1 (1) |         |         | 1 (1) |       | 0.05  |      |      |
| IPI00155647 | 203 |      |      | 19  |     |  | 1 (1) |         |         | 1 (1) |       | 0.01  |      |      |
| IPI00154742 |     | 18.2 | 15.1 | 373 | 217 |  |       | 17 (17) | 14 (14) |       | 6 (6) | 5 (5) | 1.72 | 1.72 |
| IPI00152488 |     | 146  |      | 26  |     |  |       | 1 (1)   |         |       | 1 (1) |       | 0.16 |      |
| IPI00106552 |     |      | 99   |     | 25  |  |       |         | 1 (1)   |       |       | 1 (1) |      | 0.02 |
| IPI00103891 | 137 |      |      | 25  |     |  | 1 (1) |         |         | 1 (1) |       | 0.06  |      |      |
| IPI00103341 | 131 |      | 118  | 26  | 22  |  | 1 (1) |         | 1 (1)   | 1 (1) | 1 (1) | 0.09  |      | 0.09 |
| IPI00101379 | 90  |      |      | 33  |     |  | 3 (2) |         |         | 1 (1) |       | 0.04  |      |      |
| IPI00073708 |     |      | 143  |     | 20  |  |       |         | 1 (1)   |       |       | 1 (1) |      | 0.04 |
| IPI00060800 |     |      | 204  |     | 20  |  |       | 1 (1)   |         |       | 1 (1) |       | 0.15 |      |
| IPI00045917 |     |      | 145  |     | 19  |  |       |         | 1 (1)   |       | 1 (1) |       |      | 0.06 |
| IPI00043958 |     |      | 83   |     | 28  |  |       |         | 1 (1)   |       | 1 (1) |       |      | 0.07 |
| IPI00032901 |     | 156  |      | 24  |     |  |       | 1 (1)   |         |       | 1 (1) |       | 0.03 |      |
| IPI00032808 |     |      | 120  |     | 22  |  |       |         | 1 (1)   |       | 1 (1) |       |      | 0.14 |
| IPI00032462 |     |      | 85   |     | 27  |  |       |         | 1 (1)   |       | 1 (1) |       |      | 0.06 |
| IPI00032455 |     | 123  |      | 28  |     |  |       | 1 (1)   |         |       | 1 (1) |       | 0.07 |      |
| IPI00032258 |     |      | 22   |     | 136 |  |       |         | 6 (4)   |       | 4 (3) |       |      | 0.05 |
| IPI00030882 | 143 |      |      | 24  |     |  | 1 (1) |         |         | 1 (1) |       | 0.03  |      |      |
| IPI00030739 |     |      | 144  |     | 20  |  |       |         | 1 (1)   |       | 1 (1) |       |      | 0.16 |
| IPI00029011 | 192 |      | 132  | 20  | 21  |  | 2 (1) |         | 2 (1)   | 2 (1) | 1 (1) | 0.02  |      | 0.02 |
| IPI00027683 | 136 |      |      | 25  |     |  | 2 (1) |         |         | 1 (1) |       | 0.1   |      |      |
| IPI00026926 |     | 149  |      | 25  |     |  |       | 1 (1)   |         |       | 1 (1) |       | 0.27 |      |
| IPI00026466 | 117 |      |      | 26  |     |  | 2 (1) |         |         | 2 (1) |       | 0.01  |      |      |
| IPI00025512 | 85  |      |      | 35  |     |  | 1 (1) |         |         | 1 (1) |       | 0.15  |      |      |
| IPI00025052 |     | 141  |      | 26  |     |  |       | 2 (2)   |         | 1 (1) |       |       | 0.11 |      |
| IPI00024990 |     | 121  |      | 28  |     |  |       | 2 (1)   |         | 1 (1) |       |       | 0.06 |      |
| IPI00024502 | 146 |      |      | 24  |     |  | 1 (1) |         |         | 1 (1) |       | 0.05  |      |      |
| IPI00024464 |     |      | 113  |     | 23  |  |       |         |         |       | 1 (1) |       |      | 0.23 |
| IPI00024062 |     | 173  |      | 23  |     |  |       | 1 (1)   |         |       | 1 (1) |       | 0.03 |      |
| IPI00023649 | 193 |      |      | 20  |     |  | 1 (1) |         |         | 1 (1) |       | 0.02  |      |      |
| IPI00023283 |     | 150  |      | 25  |     |  |       | 2 (1)   |         | 2 (1) |       |       |      |      |
| IPI00022974 |     | 115  |      | 31  |     |  |       | 3 (1)   |         | 2 (1) |       |       | 0.2  |      |
| IPI00022649 | 204 |      |      | 19  |     |  | 2 (1) |         |         | 2 (1) |       | 0.02  |      |      |
| IPI00022443 |     | 188  |      | 22  |     |  |       | 1 (1)   |         |       | 1 (1) |       | 0.05 |      |
| IPI00022283 |     |      | 117  |     | 22  |  |       |         |         | 1 (1) | 1 (1) |       |      | 0.36 |
| IPI00022200 |     |      | 141  |     | 20  |  |       |         |         | 1 (1) | 1 (1) |       |      | 0.01 |
| IPI00021417 |     | 137  |      | 27  |     |  |       | 2 (1)   |         |       | 1 (1) |       | 0.04 |      |
| IPI00021405 | 65  |      |      | 57  |     |  | 2 (2) |         |         | 1 (1) |       | 0.04  |      |      |
| IPI00021085 | 205 |      |      | 19  |     |  | 1 (1) |         |         | 1 (1) |       | 0.15  |      |      |
| IPI00021016 |     |      | 80   |     | 28  |  |       |         |         |       | 1 (1) |       |      | 0.09 |
| IPI00020504 |     | 127  |      | 27  |     |  |       | 1 (1)   |         |       | 1 (1) |       | 0.03 |      |
| IPI00019996 | 200 | 132  |      | 27  |     |  | 1 (1) | 1 (1)   |         | 1 (1) | 1 (1) |       | 0.03 | 0.03 |

|             |     |     |     |  |  |     |     |     |         |         |         |        |        |       |  |  |      |      |      |
|-------------|-----|-----|-----|--|--|-----|-----|-----|---------|---------|---------|--------|--------|-------|--|--|------|------|------|
| IPI00019848 |     |     | 129 |  |  | 21  |     |     | 1 (1)   |         |         | 1 (1)  |        |       |  |  | 0.02 |      | 0.02 |
| IPI00019471 | 108 |     |     |  |  | 28  |     |     | 1 (1)   |         |         | 1 (1)  |        |       |  |  |      |      |      |
| IPI00019399 |     | 86  |     |  |  | 47  |     |     |         |         |         |        |        |       |  |  |      | 0.23 |      |
| IPI00019294 |     | 183 |     |  |  | 22  |     |     | 2 (2)   |         |         | 1 (1)  |        |       |  |  |      | 0.08 |      |
| IPI00019038 |     | 57  |     |  |  | 97  |     |     | 1 (1)   |         |         | 1 (1)  |        |       |  |  |      | 0.2  |      |
| IPI00018901 |     | 177 |     |  |  | 23  |     |     | 2 (2)   |         |         | 1 (1)  |        |       |  |  |      | 0.05 |      |
| IPI00018840 |     |     | 112 |  |  |     |     |     | 1 (1)   |         |         |        |        |       |  |  |      |      | 0.05 |
| IPI00018528 | 181 |     |     |  |  | 21  |     |     | 2 (1)   |         |         | 1 (1)  |        |       |  |  |      |      |      |
| IPI00018403 |     |     | 133 |  |  | 21  |     |     | 1 (1)   |         |         | 1 (1)  |        |       |  |  | 0.31 |      | 0.1  |
| IPI00018247 | 111 |     |     |  |  | 27  |     |     | 1 (1)   |         |         | 1 (1)  |        |       |  |  |      | 0.08 |      |
| IPI00017870 |     |     | 69  |  |  | 31  |     |     |         |         |         | 3 (1)  |        |       |  |  |      |      | 0.06 |
| IPI00017375 |     |     | 119 |  |  | 22  |     |     | 1 (1)   |         |         | 1 (1)  |        |       |  |  |      |      | 0.04 |
| IPI00017303 |     |     | 92  |  |  | 25  |     |     | 1 (1)   |         |         | 1 (1)  |        |       |  |  |      |      | 0.03 |
| IPI00014898 |     |     | 96  |  |  | 25  |     |     | 4 (1)   |         |         | 1 (1)  |        |       |  |  |      |      | 0.01 |
| IPI00014236 | 188 |     |     |  |  | 21  |     |     | 1 (1)   |         |         | 1 (1)  |        |       |  |  |      | 0.06 |      |
| IPI00013933 | 94  | 90  | 44  |  |  | 32  | 42  | 55  | 3 (2)   | 3 (2)   | 6 (3)   | 2 (1)  | 2 (1)  | 4 (2) |  |  | 0.01 | 0.01 | 0.02 |
| IPI00013297 |     | 192 |     |  |  | 22  |     |     | 1 (1)   |         |         | 1 (1)  |        |       |  |  |      | 0.16 |      |
| IPI00012593 |     |     | 74  |  |  |     |     | 29  |         |         |         |        |        | 1 (1) |  |  |      |      | 0.03 |
| IPI00012364 | 93  |     |     |  |  | 32  |     |     | 1 (1)   |         |         | 1 (1)  |        |       |  |  |      | 0.17 |      |
| IPI00012347 | 128 |     |     |  |  | 26  |     |     | 1 (1)   |         |         | 1 (1)  |        |       |  |  |      | 0.01 |      |
| IPI00012283 | 159 |     |     |  |  | 23  |     |     | 1 (1)   |         |         | 1 (1)  |        |       |  |  |      | 0.04 |      |
| IPI00011961 |     |     | 103 |  |  |     |     | 24  |         |         |         |        |        | 1 (1) |  |  |      |      | 0.02 |
| IPI00011730 | 149 |     |     |  |  | 24  |     |     | 1 (1)   |         |         | 1 (1)  |        |       |  |  |      | 0.04 |      |
| IPI00011159 |     | 169 |     |  |  | 23  |     |     | 1 (1)   |         |         | 1 (1)  |        |       |  |  |      | 0.02 |      |
| IPI00011032 | 98  |     |     |  |  | 29  |     |     | 1 (1)   |         |         | 1 (1)  |        |       |  |  |      | 0.06 |      |
| IPI00010195 |     |     | 140 |  |  |     |     | 20  |         |         |         |        |        | 1 (1) |  |  |      |      | 0.04 |
| IPI00009866 | 3.5 | 4.5 | 2.5 |  |  | 340 | 341 | 219 | 21 (18) | 21 (18) | 15 (12) | 10 (9) | 10 (9) | 6 (6) |  |  | 0.89 | 0.78 | 0.47 |
| IPI00009855 |     |     | 126 |  |  |     |     | 21  |         |         |         |        |        | 1 (1) |  |  |      |      | 0.05 |
| IPI00009790 | 109 | 151 | 59  |  |  | 28  | 25  | 36  | 2 (2)   | 2 (1)   | 1 (1)   | 1 (1)  | 1 (1)  | 1 (1) |  |  | 0.04 | 0.04 | 0.04 |
| IPI00008247 |     |     | 147 |  |  |     |     | 19  |         |         |         |        |        | 1 (1) |  |  |      |      | 0.04 |
| IPI00007921 |     |     | 142 |  |  |     |     | 20  |         |         |         |        |        | 1 (1) |  |  |      |      | 0.02 |
| IPI00007515 |     |     | 134 |  |  |     |     | 21  |         |         |         |        |        | 1 (1) |  |  |      |      | 0.04 |
| IPI00007244 |     | 147 |     |  |  |     | 26  |     |         |         |         |        |        | 2 (2) |  |  |      | 0.04 |      |
| IPI00006663 |     | 193 |     |  |  |     | 21  |     |         |         |         |        |        | 1 (1) |  |  |      | 0.06 |      |
| IPI00006608 |     |     | 136 |  |  |     |     | 21  |         |         |         |        |        | 1 (1) |  |  |      |      | 0.04 |
| IPI00006130 | 125 |     |     |  |  | 26  |     |     | 1 (1)   |         |         | 1 (1)  |        |       |  |  |      | 0.06 |      |
| IPI00006014 |     |     | 138 |  |  |     |     | 21  |         |         |         |        |        | 1 (1) |  |  |      |      | 0.03 |
| IPI00005492 | 197 |     |     |  |  | 20  |     |     | 1 (1)   |         |         | 1 (1)  |        |       |  |  |      | 0.09 |      |
| IPI00005263 |     | 155 |     |  |  |     | 24  |     |         |         |         |        |        | 1 (1) |  |  |      | 0.16 |      |
| IPI00004573 |     | 89  |     |  |  |     | 42  |     |         |         |         |        |        | 1 (1) |  |  |      | 0.04 |      |
| IPI00004408 | 96  |     |     |  |  | 30  |     |     | 1 (1)   |         |         | 1 (1)  |        |       |  |  |      | 0.04 |      |
| IPI00003565 | 113 |     |     |  |  | 27  |     |     | 1 (1)   |         |         | 1 (1)  |        |       |  |  |      | 0.14 |      |
| IPI00003271 | 156 |     |     |  |  | 23  |     |     | 1 (1)   |         |         | 1 (1)  |        |       |  |  |      | 0.07 |      |
| IPI00003269 |     | 125 |     |  |  |     | 28  |     |         |         |         |        |        | 2 (1) |  |  |      | 0.08 |      |
| IPI00002591 |     | 164 |     |  |  |     | 24  |     |         |         |         |        |        | 1 (1) |  |  |      | 0.04 |      |
| IPI00001735 | 195 |     |     |  |  | 20  |     |     | 2 (1)   |         |         | 2 (1)  |        |       |  |  |      | 0.01 |      |
| IPI00001726 |     |     | 125 |  |  |     |     | 21  |         |         |         |        |        | 1 (1) |  |  |      |      | 0.03 |

**Protein Description**

**Protein Description**

Tax\_Id=9606 Gene\_Symbol=C3 Complement C3 (Fragment)  
Tax\_Id=9606 Gene\_Symbol=KRT1 Keratin;;; type II cytoskeletal 1  
Tax\_Id=9606 Gene\_Symbol=KRT2 Keratin;;; type II cytoskeletal 2 epidermal  
Tax\_Id=9606 Gene\_Symbol=KRT6A Keratin;;; type II cytoskeletal 6A  
Tax\_Id=9606 Gene\_Symbol=KRT6B cDNA FLJ60647;;; highly similar to Keratin;;; type II cytoskeletal 6B  
Tax\_Id=9606 Gene\_Symbol=KRT5 Keratin;;; type II cytoskeletal 5  
Tax\_Id=9606 Gene\_Symbol=KRT77 Keratin;;; type II cytoskeletal 1b  
Tax\_Id=9606 Gene\_Symbol=KRT3 Keratin;;; type II cytoskeletal 3  
Tax\_Id=9606 Gene\_Symbol=KRT73 Isoform 1 of Keratin;;; type II cytoskeletal 73  
Tax\_Id=9606 Gene\_Symbol=APOB Apolipoprotein B-100  
Tax\_Id=9606 Gene\_Symbol=KRT10 Keratin;;; type I cytoskeletal 10  
Tax\_Id=9606 Gene\_Symbol=KRT9 Keratin;;; type I cytoskeletal 9  
Tax\_Id=9606 Gene\_Symbol=KRT14 Keratin;;; type I cytoskeletal 14  
Tax\_Id=9606 Gene\_Symbol=KRT16 Keratin;;; type I cytoskeletal 16  
Tax\_Id=9606 Gene\_Symbol=KRT17 Keratin;;; type I cytoskeletal 17  
Tax\_Id=9606 Gene\_Symbol=- NANUC-1 heavy chain (Fragment)

Tax\_Id=9606 Gene\_Symbol=- Putative uncharacterized protein  
Tax\_Id=9606 Gene\_Symbol=- Myosin-reactive immunoglobulin heavy chain variable region (Fragment)  
Tax\_Id=9606 Gene\_Symbol=- Ig kappa chain V-III region B6  
Tax\_Id=9606 Gene\_Symbol=- Ig kappa chain V-III region NG9 (Fragment)  
Tax\_Id=9606 Gene\_Symbol=IGHV4-31;IGHG1 Putative uncharacterized protein DKFZp686N02209  
Tax\_Id=9606 Gene\_Symbol=IGHG2 Putative uncharacterized protein DKFZp686I04196 (Fragment)  
Tax\_Id=9606 Gene\_Symbol=IGHM FLJ00385 protein (Fragment)  
Tax\_Id=9606 Gene\_Symbol=- Similar to Hepatitis B virus receptor binding protein  
Tax\_Id=9606 Gene\_Symbol=- Similar to Cold agglutinin FS-1 H-chain  
Tax\_Id=9606 Gene\_Symbol=IGHG4 Putative uncharacterized protein DKFZp686M24218  
Tax\_Id=9606 Gene\_Symbol=- Ig kappa chain V-III region SIE  
Tax\_Id=9606 Gene\_Symbol=- Ig heavy chain V-III region TUR  
Tax\_Id=9606 Gene\_Symbol=C4A Uncharacterized protein  
Tax\_Id=9606 Gene\_Symbol=A2M Alpha-2-macroglobulin  
Tax\_Id=9606 Gene\_Symbol=PZP Isoform 1 of Pregnancy zone protein  
Tax\_Id=9606 Gene\_Symbol=ALB Isoform 1 of Serum albumin  
Tax\_Id=9606 Gene\_Symbol=IGHM Isoform 2 of Ig mu chain C region  
Tax\_Id=9606 Gene\_Symbol=IGHM Full-length cDNA clone CS0DD006YL02 of Neuroblastoma of Homo sapiens  
Tax\_Id=9606 Gene\_Symbol=APOA1 Apolipoprotein A-I  
Tax\_Id=9606 Gene\_Symbol=IGHA1 CDNA FLJ25298 fis;;; clone STM07683;;; highly similar to Protein Tro alpha 1 H;;;myeloma  
Tax\_Id=9606 Gene\_Symbol=IGHA2 cDNA FLJ41981 fis;;; clone SMINT2011888;;; highly similar to Protein Tro alpha 1 H;;;myeloma  
Tax\_Id=9606 Gene\_Symbol=IGHA2 Putative uncharacterized protein DKFZp686C02220 (Fragment)  
Tax\_Id=9606 Gene\_Symbol=FGB Fibrinogen beta chain  
Tax\_Id=9606 Gene\_Symbol=FGA Isoform 1 of Fibrinogen alpha chain  
Tax\_Id=9606 Gene\_Symbol=IGLV1-44 Putative uncharacterized protein  
Tax\_Id=9606 Gene\_Symbol=- Putative uncharacterized protein  
Tax\_Id=9606 Gene\_Symbol=IGLC1 IGL@ protein  
Tax\_Id=9606 Gene\_Symbol=IGLV6-57 Amyloid lambda 6 light chain variable region SAR (Fragment)  
Tax\_Id=9606 Gene\_Symbol=FGG Isoform Gamma-B of Fibrinogen gamma chain  
Tax\_Id=9606 Gene\_Symbol=- Possible J 56 gene segment (Fragment)  
Tax\_Id=9606 Gene\_Symbol=SERPINA1 Isoform 1 of Alpha-1-antitrypsin  
Tax\_Id=9606 Gene\_Symbol=KNG1 Isoform LMW of Kininogen-1  
Tax\_Id=9606 Gene\_Symbol=ITIH1 Inter-alpha-trypsin inhibitor heavy chain H1  
Tax\_Id=9606 Gene\_Symbol=AGT Angiotensinogen  
Tax\_Id=9606 Gene\_Symbol=ITIH4 Isoform 2 of Inter-alpha-trypsin inhibitor heavy chain H4  
Tax\_Id=9606 Gene\_Symbol=ITIH2 Inter-alpha (Globulin) inhibitor H2;;; isoform CRA\_a  
Tax\_Id=9606 Gene\_Symbol=APOA4 Apolipoprotein A-IV  
Tax\_Id=9606 Gene\_Symbol=GC vitamin D-binding protein isoform 1 precursor  
Tax\_Id=9606 Gene\_Symbol=HPR Isoform 1 of Haptoglobin-related protein  
Tax\_Id=9606 Gene\_Symbol=HP.HPR Haptoglobin  
Tax\_Id=9606 Gene\_Symbol=SERPIND1 Heparin cofactor 2  
Tax\_Id=9606 Gene\_Symbol=PLG Plasminogen  
Tax\_Id=9606 Gene\_Symbol=TF Serotransferrin  
Tax\_Id=9606 Gene\_Symbol=SERPINA3 Isoform 1 of Alpha-1-antichymotrypsin  
Tax\_Id=9606 Gene\_Symbol=HBB Hemoglobin subunit beta  
Tax\_Id=9606 Gene\_Symbol=HBD Hemoglobin subunit delta  
Tax\_Id=9606 Gene\_Symbol=AHSG cDNA FLJ55606;;; highly similar to Alpha-2-HS-glycoprotein  
Tax\_Id=9606 Gene\_Symbol=- cDNA FLJ56822;;; highly similar to Alpha-2-HS-glycoprotein  
Tax\_Id=9606 Gene\_Symbol=F2 Prothrombin (Fragment)  
Tax\_Id=9606 Gene\_Symbol=SERPINF2 Alpha-2-antiplasmin  
Tax\_Id=9606 Gene\_Symbol=ITIH3 Isoform 1 of Inter-alpha-trypsin inhibitor heavy chain H3  
Tax\_Id=9606 Gene\_Symbol=PROS1 Vitamin K-dependent protein S  
Tax\_Id=9606 Gene\_Symbol=A1BG Isoform 1 of Alpha-1B-glycoprotein  
Tax\_Id=9606 Gene\_Symbol=PON1 Serum paraoxonase/arylesterase 1  
Tax\_Id=9606 Gene\_Symbol=HBA2;HBA1 Hemoglobin subunit alpha  
Tax\_Id=9606 Gene\_Symbol=TTR Transthyretin  
Tax\_Id=9606 Gene\_Symbol=- Similar to VH4 heavy chain variable region precursor  
Tax\_Id=9606 Gene\_Symbol=C9 Complement component C9  
Tax\_Id=9606 Gene\_Symbol=AMBIP Protein AMBP  
Tax\_Id=9606 Gene\_Symbol=C1R Complement C1r subcomponent  
Tax\_Id=9606 Gene\_Symbol=- Ig kappa chain V-IV region Len  
Tax\_Id=9606 Gene\_Symbol=CD5L CD5 antigen-like  
Tax\_Id=9606 Gene\_Symbol=APOL1 Isoform 2 of Apolipoprotein L1  
Tax\_Id=9606 Gene\_Symbol=HRNR Homerin  
Tax\_Id=9606 Gene\_Symbol=APOE Apolipoprotein E  
Tax\_Id=9606 Gene\_Symbol=FCGBP IgGfc-binding protein  
Tax\_Id=9606 Gene\_Symbol=- Ig kappa chain V-I region AG

Tax\_Id=9606 Gene\_Symbol=- Ig kappa chain V-I region DEE  
Tax\_Id=9606 Gene\_Symbol=- Ig kappa chain V-I region Ni  
Tax\_Id=9606 Gene\_Symbol=CLU Isoform 1 of Clusterin  
Tax\_Id=9606 Gene\_Symbol=CP Ceruloplasmin  
Tax\_Id=9606 Gene\_Symbol=FETUB Uncharacterized protein  
Tax\_Id=9606 Gene\_Symbol=CD14 Monocyte differentiation antigen CD14  
Tax\_Id=9606 Gene\_Symbol=- Myosin-reactive immunoglobulin kappa chain variable region (Fragment)  
Tax\_Id=9606 Gene\_Symbol=IGKV3D-15 Myosin-reactive immunoglobulin light chain variable region  
Tax\_Id=9606 Gene\_Symbol=- Ig kappa chain V-I region EU  
Tax\_Id=9606 Gene\_Symbol=C6 Complement component C6 precursor  
Tax\_Id=9606 Gene\_Symbol=APOC3 Apolipoprotein C-III  
Tax\_Id=9606 Gene\_Symbol=LCAT Phosphatidylcholine-sterol acyltransferase  
Tax\_Id=9606 Gene\_Symbol=PKP1 Isoform 2 of Plakophilin-1  
Tax\_Id=9606 Gene\_Symbol=C7 Complement component C7  
Tax\_Id=9606 Gene\_Symbol=C4BPA C4b-binding protein alpha chain  
Tax\_Id=9606 Gene\_Symbol=- Immunglobulin heavy chain variable region (Fragment)  
Tax\_Id=9606 Gene\_Symbol=- Ig heavy chain V-III region GAL  
Tax\_Id=9606 Gene\_Symbol=- Ig kappa chain V-I region Wes  
Tax\_Id=9606 Gene\_Symbol=CPN2 Carboxypeptidase N subunit 2  
Tax\_Id=9606 Gene\_Symbol=KRT78 Isoform 2 of Keratin;;; type II cytoskeletal 78  
Tax\_Id=9606 Gene\_Symbol=SERPINC1 Antithrombin-III  
Tax\_Id=9606 Gene\_Symbol=PRPS1 Ribose-phosphate pyrophosphokinase 1  
Tax\_Id=9606 Gene\_Symbol=CFB cDNA FLJ55673;;; highly similar to Complement factor B  
Tax\_Id=9606 Gene\_Symbol=- Myosin-reactive immunoglobulin heavy chain variable region (Fragment)  
Tax\_Id=9606 Gene\_Symbol=FLG2 Filaggrin-2  
Tax\_Id=9606 Gene\_Symbol=- Immunoglobulin heavy chain  
Tax\_Id=9606 Gene\_Symbol=SERPING1 Plasma protease C1 inhibitor  
Tax\_Id=9606 Gene\_Symbol=- Rheumatoid factor D5 light chain (Fragment)  
Tax\_Id=9606 Gene\_Symbol=- Similar to Ig kappa chain V-IV region JI precursor  
Tax\_Id=9606 Gene\_Symbol=HPX Hemopexin  
Tax\_Id=9606 Gene\_Symbol=PGLYRP2 Isoform 1 of N-acetylmuramoyl-L-alanine amidase  
Tax\_Id=9606 Gene\_Symbol=- Ig kappa chain V-I region BAN  
Tax\_Id=9606 Gene\_Symbol=- Anti-thyroglobulin light chain variable region (Fragment)  
Tax\_Id=9606 Gene\_Symbol=CDH5 Cadherin-5  
Tax\_Id=9606 Gene\_Symbol=C1RL Complement C1r subcomponent-like protein  
Tax\_Id=9606 Gene\_Symbol=- Similar to Myosin-reactive immunoglobulin heavy chain variable region  
Tax\_Id=9606 Gene\_Symbol=S100A8 Protein S100-A8  
Tax\_Id=9606 Gene\_Symbol=- Similar to VH-3 family (VH26)D/J protein  
Tax\_Id=9606 Gene\_Symbol=C1S Complement C1s subcomponent  
Tax\_Id=9606 Gene\_Symbol=CA1 Carbonic anhydrase 1  
Tax\_Id=9606 Gene\_Symbol=SHBG Isoform 1 of Sex hormone-binding globulin  
Tax\_Id=9606 Gene\_Symbol=LOC652113 Immunglobulin heavy chain variable region  
Tax\_Id=9606 Gene\_Symbol=AFM Afamin  
Tax\_Id=9606 Gene\_Symbol=GSN Isoform 1 of Gelsolin  
Tax\_Id=9606 Gene\_Symbol=- Similar to Myosin-reactive immunoglobulin heavy chain variable region Tax\_Id=9606 Gene\_Symbol=DSP cDNA FLJ61543;;; highly similar to Desmoplakin  
Tax\_Id=9606 Gene\_Symbol=CHL1 Isoform 2 of Neural cell adhesion molecule L1-like protein  
Tax\_Id=9606 Gene\_Symbol=- Ig heavy chain V-III region BUT  
Tax\_Id=9606 Gene\_Symbol=- HRV Fab N6-VL (Fragment)  
Tax\_Id=9606 Gene\_Symbol=PRSS3 Isoform A of Trypsin-3  
Tax\_Id=9606 Gene\_Symbol=APOD Apolipoprotein D  
Tax\_Id=9606 Gene\_Symbol=ACTB Actin;;; cytoplasmic 1  
Tax\_Id=9606 Gene\_Symbol=IGHD Isoform 2 of Ig delta chain C region  
Tax\_Id=9606 Gene\_Symbol=SERPINA6 Corticosteroid-binding globulin  
Tax\_Id=9606 Gene\_Symbol=DSG1 Desmoglein-1  
Tax\_Id=9606 Gene\_Symbol=ORC4 Origin recognition complex subunit 4  
Tax\_Id=9606 Gene\_Symbol=CAT Catalase  
Tax\_Id=9606 Gene\_Symbol=ORM2 Alpha-1-acid glycoprotein 2  
Tax\_Id=9606 Gene\_Symbol=F13B Coagulation factor XIII B chain  
Tax\_Id=9606 Gene\_Symbol=DSC1 Isoform 1A of Desmocollin-1  
Tax\_Id=9606 Gene\_Symbol=WDR60 WD repeat-containing protein 60  
Tax\_Id=9606 Gene\_Symbol=- 10 kDa protein  
Tax\_Id=9606 Gene\_Symbol=SERPINA7 Thyroxine-binding globulin  
Tax\_Id=9606 Gene\_Symbol=SERPINB12 Serpin B12  
Tax\_Id=9606 Gene\_Symbol=PRSS1 Trypsin-1  
Tax\_Id=9606 Gene\_Symbol=BOD1L Biorientation of chromosomes in cell division protein 1-like  
Tax\_Id=9606 Gene\_Symbol=IGJ Immunoglobulin J chain  
Tax\_Id=9606 Gene\_Symbol=- 13 kDa protein

Tax\_Id=9606 Gene\_Symbol=- Cold agglutinin FS-2 H-chain (Fragment)  
Tax\_Id=9606 Gene\_Symbol=SIM1 Single-minded homolog 1  
Tax\_Id=9606 Gene\_Symbol=CAMSAP1 Isoform 1 of Calmodulin-regulated spectrin-associated protein 1  
Tax\_Id=9606 Gene\_Symbol=PRDX2 Peroxiredoxin-2  
Tax\_Id=9606 Gene\_Symbol=IGLV3-25 V2-17 protein  
Tax\_Id=9606 Gene\_Symbol=DEFA1;DEFA1B Neutrophil defensin 1  
Tax\_Id=9606 Gene\_Symbol=LCP1 Plastin-2  
Tax\_Id=9606 Gene\_Symbol=DCD Dermcidin  
Tax\_Id=9606 Gene\_Symbol=CUL5 Uncharacterized protein  
Tax\_Id=9606 Gene\_Symbol=- Ig lambda chain V-III region SH  
Tax\_Id=9606 Gene\_Symbol=CARD6 Caspase recruitment domain-containing protein 6  
Tax\_Id=9606 Gene\_Symbol=PDE4D Isoform 5 of cAMP-specific 3',5'-cyclic phosphodiesterase 4D  
Tax\_Id=9606 Gene\_Symbol=POLB Protein  
Tax\_Id=9606 Gene\_Symbol=DLGAP1 Isoform 1 of Disks large-associated protein 1  
Tax\_Id=9606 Gene\_Symbol=GNA15 Guanine nucleotide-binding protein subunit alpha-15  
Tax\_Id=9606 Gene\_Symbol=ITGAX Similar to Integrin alpha-X precursor  
Tax\_Id=9606 Gene\_Symbol=- Conserved hypothetical protein  
Tax\_Id=9606 Gene\_Symbol=BMP2 Bone morphogenetic protein receptor type-2  
Tax\_Id=9606 Gene\_Symbol=FRAT2 GSK-3-binding protein FRAT2  
Tax\_Id=9606 Gene\_Symbol=DOCK10 Isoform 1 of Dedicator of cytokinesis protein 10  
Tax\_Id=9606 Gene\_Symbol=IGLV7-43 Ig lambda chain V region 4A  
Tax\_Id=9606 Gene\_Symbol=SBSN suprabasin isoform 1 precursor  
Tax\_Id=9606 Gene\_Symbol=HGSNAT Uncharacterized protein  
Tax\_Id=9606 Gene\_Symbol=PAX5 B cell specific activator protein variant delta 6/7/8/9  
Tax\_Id=9606 Gene\_Symbol=USP36 Isoform 2 of Ubiquitin carboxyl-terminal hydrolase 36  
Tax\_Id=9606 Gene\_Symbol=ACTL7A Actin-like protein 7A  
Tax\_Id=9606 Gene\_Symbol=ZNF410 9 kDa protein  
Tax\_Id=9606 Gene\_Symbol=JUP Junction plakoglobin  
Tax\_Id=9606 Gene\_Symbol=BTNL8 butyrophilin-like protein 8 isoform 3 precursor  
Tax\_Id=9606 Gene\_Symbol=IPO4 Isoform 1 of Importin-4  
Tax\_Id=9606 Gene\_Symbol=SLAIN1 27 kDa protein  
Tax\_Id=9606 Gene\_Symbol=BCL11B Isoform 1 of B-cell lymphoma/leukemia 11B  
Tax\_Id=9606 Gene\_Symbol=FAM134C Protein FAM134C  
Tax\_Id=9606 Gene\_Symbol=KLC4 Protein  
Tax\_Id=9606 Gene\_Symbol=RF7 DNA-binding protein RF7  
Tax\_Id=9606 Gene\_Symbol=GCHFR GTP cyclohydrolase 1 feedback regulatory protein  
Tax\_Id=9606 Gene\_Symbol=CDYL Uncharacterized protein  
Tax\_Id=9606 Gene\_Symbol=NSUN5 Isoform 2 of Putative methyltransferase NSUN5  
Tax\_Id=9606 Gene\_Symbol=SMC1A Structural maintenance of chromosomes protein 1A  
Tax\_Id=9606 Gene\_Symbol=C20orf134 Putative uncharacterized actin family protein C20orf134  
Tax\_Id=9606 Gene\_Symbol=MT-ND2 NADH-ubiquinone oxidoreductase chain 2  
Tax\_Id=9606 Gene\_Symbol=PPCS Uncharacterized protein  
Tax\_Id=9606 Gene\_Symbol=RBP4 Retinol-binding protein 4  
Tax\_Id=9606 Gene\_Symbol=GLIS2 Zinc finger protein GLIS2  
Tax\_Id=9606 Gene\_Symbol=C8orf73 cDNA FLJ78490  
Tax\_Id=9606 Gene\_Symbol=NAA35 N-alpha-acetyltransferase 35;;; NatC auxiliary subunit  
Tax\_Id=9606 Gene\_Symbol=AQP12B Uncharacterized protein  
Tax\_Id=9606 Gene\_Symbol=DCHS1 Protocadherin-16  
Tax\_Id=9606 Gene\_Symbol=PMS2P1 Isoform 1 of Putative postmeiotic segregation increased 2-like protein 1  
Tax\_Id=9606 Gene\_Symbol=EMR3 Isoform 2 of EGF-like module-containing mucin-like hormone receptor-like 3  
Tax\_Id=9606 Gene\_Symbol=APOC2 Apolipoprotein C-II  
Tax\_Id=9606 Gene\_Symbol=THNSL2 Isoform 4 of Threonine synthase-like 2  
Tax\_Id=9606 Gene\_Symbol=GZMA Isoform alpha of Granzyme A (Fragment)  
Tax\_Id=9606 Gene\_Symbol=CALML5 Calmodulin-like protein 5  
Tax\_Id=9606 Gene\_Symbol=C18orf63 Uncharacterized protein C18orf63  
Tax\_Id=9606 Gene\_Symbol=- Protein  
Tax\_Id=9606 Gene\_Symbol=CLCN1 Chloride channel protein 1  
Tax\_Id=9606 Gene\_Symbol=NEK11 Isoform 3 of Serine/threonine-protein kinase Nek11  
Tax\_Id=9606 Gene\_Symbol=ASTL Astacin-like metalloendopeptidase  
Tax\_Id=9606 Gene\_Symbol=ENG Isoform Long of Endoglin  
Tax\_Id=9606 Gene\_Symbol=CDH13 cDNA FLJ52398;;; highly similar to Cadherin-13  
Tax\_Id=9606 Gene\_Symbol=SLC7A8 Large neutral amino acids transporter small subunit 2  
Tax\_Id=9606 Gene\_Symbol=BANP Isoform 1 of Protein BANP  
Tax\_Id=9606 Gene\_Symbol=OFD1 Isoform 1 of Oral-facial-digital syndrome 1 protein  
Tax\_Id=9606 Gene\_Symbol=FANCI Isoform 1 of Fanconi anemia group I protein  
Tax\_Id=9606 Gene\_Symbol=PIGS cDNA FLJ45226 fis;;; clone BRCAN2020412;;; highly similar to GPI transamidase component PIG-S  
Tax\_Id=9606 Gene\_Symbol=APOA2 Apolipoprotein A-II

Tax\_Id=9606 Gene\_Symbol=TBX6 T-box transcription factor TBX6  
Tax\_Id=9606 Gene\_Symbol=TNFRSF1A Uncharacterized protein  
Tax\_Id=9606 Gene\_Symbol=H2AFV Histone H2A.V  
Tax\_Id=9606 Gene\_Symbol=RNH1 Uncharacterized protein  
Tax\_Id=9606 Gene\_Symbol=MTA1 Protein  
Tax\_Id=9606 Gene\_Symbol=CNDP1 Beta-Ala-His dipeptidase  
Tax\_Id=9606 Gene\_Symbol=CEP152 Isoform 3 of Centrosomal protein of 152 kDa  
Tax\_Id=9606 Gene\_Symbol=ZC3H12D Isoform 1 of Probable ribonuclease ZC3H12D  
Tax\_Id=9606 Gene\_Symbol=DTWD2 DTW domain-containing protein 2  
Tax\_Id=9606 Gene\_Symbol=- Similar to VH-7 family (N54P3)D/J protein  
Tax\_Id=9606 Gene\_Symbol=C19orf68 Uncharacterized protein C19orf68  
Tax\_Id=9606 Gene\_Symbol=GEMIN5 Gem-associated protein 5  
Tax\_Id=9606 Gene\_Symbol=S100A9 Protein S100-A9  
Tax\_Id=9606 Gene\_Symbol=- V1-18 protein  
Tax\_Id=9606 Gene\_Symbol=KPRP Keratinocyte proline-rich protein  
Tax\_Id=9606 Gene\_Symbol=- Similar to Cold agglutinin FS-1 H-chain  
Tax\_Id=9606 Gene\_Symbol=PMF1;PMF1-BGLAP Isoform 3 of Polyamine-modulated factor 1  
Tax\_Id=9606 Gene\_Symbol=SLIT2 Isoform 1 of Slit homolog 2 protein  
Tax\_Id=9606 Gene\_Symbol=MTHFD1 cDNA FLJ56016;;; highly similar to C-1-tetrahydrofolate synthase;;; cytoplasmic  
Tax\_Id=9606 Gene\_Symbol=- Similar to Myosin-reactive immunoglobulin heavy chain variable region  
Tax\_Id=9606 Gene\_Symbol=SRCAP Isoform 2 of Helicase SRCAP  
Tax\_Id=9606 Gene\_Symbol=BRWD1 Isoform B of Bromodomain and WD repeat-containing protein 1  
Tax\_Id=9606 Gene\_Symbol=ARHGAP27 Isoform 4 of Rho GTPase-activating protein 27  
Tax\_Id=9606 Gene\_Symbol=PACS1 Isoform 1 of Phosphofurin acidic cluster sorting protein 1  
Tax\_Id=9606 Gene\_Symbol=- cDNA PSEC0234 fis;;; clone: HEMBA1007044;;; highly similar to FIBROMODULIN  
Tax\_Id=9606 Gene\_Symbol=ST7L Isoform 2 of Suppressor of tumorigenicity 7 protein-like  
Tax\_Id=9606 Gene\_Symbol=DTHD1 Isoform 2 of Death domain-containing protein 1  
Tax\_Id=9606 Gene\_Symbol=FCN1 Fascin  
Tax\_Id=9606 Gene\_Symbol=FBXL4 F-box/LRR-repeat protein  
Tax\_Id=9606 Gene\_Symbol=KIAA0930 C22orf9 protein (Fragment)  
Tax\_Id=9606 Gene\_Symbol=IGKV3-20 Myosin-reactive immunoglobulin light chain variable region (Fragment)  
Tax\_Id=9606 Gene\_Symbol=ZFP36L1 23 kDa protein  
Tax\_Id=9606 Gene\_Symbol=SLIRP Protein  
Tax\_Id=9606 Gene\_Symbol=MTERFD3 Uncharacterized protein  
Tax\_Id=9606 Gene\_Symbol=C12orf77 9 kDa protein Tax\_Id=9606  
Gene\_Symbol=NOVA1 29 kDa protein  
Tax\_Id=9606 Gene\_Symbol=ARF3 Uncharacterized protein  
Tax\_Id=9606 Gene\_Symbol=PPFIA2 141 kDa protein  
Tax\_Id=9606 Gene\_Symbol=BCKDHA Uncharacterized protein  
Tax\_Id=9606 Gene\_Symbol=NUP214 Protein  
Tax\_Id=9606 Gene\_Symbol=MATN2 Protein  
Tax\_Id=9606 Gene\_Symbol=MRV11 Uncharacterized protein  
Tax\_Id=9606 Gene\_Symbol=HSF4 Protein  
Tax\_Id=9606 Gene\_Symbol=UNC13A 193 kDa protein  
Tax\_Id=9606 Gene\_Symbol=- Conserved hypothetical protein  
Tax\_Id=9606 Gene\_Symbol=LOC100288860 Conserved hypothetical protein  
Tax\_Id=9606 Gene\_Symbol=- HRV Fab 025-VL (Fragment)  
Tax\_Id=9606 Gene\_Symbol=BANF1 Uncharacterized protein  
Tax\_Id=9606 Gene\_Symbol=IGKC Ig kappa chain C region  
Tax\_Id=9606 Gene\_Symbol=LOC100131091 hypothetical protein LOC100131091  
Tax\_Id=9606 Gene\_Symbol=HLA-DOB Major histocompatibility complex;;; class II;;; DO beta  
Tax\_Id=9606 Gene\_Symbol=APC adenomatous polyposis coli protein isoform a  
Tax\_Id=9606 Gene\_Symbol=ART3 Mono-ADP-ribosyltransferase 3 variant III  
Tax\_Id=9606 Gene\_Symbol=NME9 Uncharacterized protein  
Tax\_Id=9606 Gene\_Symbol=C6orf130 Protein  
Tax\_Id=9606 Gene\_Symbol=ABR active breakpoint cluster region-related protein isoform c  
Tax\_Id=9606 Gene\_Symbol=SIGLEC11 Protein  
Tax\_Id=9606 Gene\_Symbol=EDEM1 Uncharacterized protein  
Tax\_Id=9606 Gene\_Symbol=RCC1 Protein  
Tax\_Id=9606 Gene\_Symbol=SLC41A2 Uncharacterized protein  
Tax\_Id=9606 Gene\_Symbol=SPCS1 Signal peptidase complex subunit 1  
Tax\_Id=9606 Gene\_Symbol=- Conserved hypothetical protein  
Tax\_Id=9606 Gene\_Symbol=ZBTB7B Conserved hypothetical protein  
Tax\_Id=9606 Gene\_Symbol=MFS6 Protein  
Tax\_Id=9606 Gene\_Symbol=CUL3 Protein  
Tax\_Id=9606 Gene\_Symbol=ZAN cDNA FLJ50298;;; highly similar to Zonadhesin  
Tax\_Id=9606 Gene\_Symbol=C1orf201 cDNA FLJ54645

Tax\_Id=9606 Gene\_Symbol=NXN cDNA FLJ52003;;; highly similar to Homo sapiens nucleoredoxin (NXN);;; mRNA  
Tax\_Id=9606 Gene\_Symbol=MOGS cDNA FLJ55624;;; highly similar to Mannosyl-oligosaccharide glucosidase  
Tax\_Id=9606 Gene\_Symbol=FARP2 Uncharacterized protein  
Tax\_Id=9606 Gene\_Symbol=PLA2G6 Phospholipase A2;;; group VI  
Tax\_Id=9606 Gene\_Symbol=SNORD84;DDX39B HLA-B associated transcript 1  
Tax\_Id=9606 Gene\_Symbol=- Uncharacterized protein  
Tax\_Id=9606 Gene\_Symbol=- Anti-HER3 scFv (Fragment)  
Tax\_Id=9606 Gene\_Symbol=ANK3 Uncharacterized protein  
Tax\_Id=9606 Gene\_Symbol=PLA2G2C Putative inactive group IIC secretory phospholipase A2  
Tax\_Id=9606 Gene\_Symbol=COL6A6 Isoform 1 of Collagen alpha-6(VI) chain  
Tax\_Id=9606 Gene\_Symbol=- V(Alpha) Linv /J(Alpha) Q  
Tax\_Id=9606 Gene\_Symbol=COL18A1 Multi-functional protein MFP  
Tax\_Id=9606 Gene\_Symbol=- HRV Fab 027-VL (Fragment)  
Tax\_Id=9606 Gene\_Symbol=COL18A1 Protein  
Tax\_Id=9606 Gene\_Symbol=NCKAP5L Isoform 3 of Nck-associated protein 5-like  
Tax\_Id=9606 Gene\_Symbol=CEP290 291 kDa protein  
Tax\_Id=9606 Gene\_Symbol=VPS13D Isoform 2 of Vacuolar protein sorting-associated protein 13D  
Tax\_Id=9606 Gene\_Symbol=- Myosin-reactive immunoglobulin heavy chain variable region (Fragment)  
Tax\_Id=9606 Gene\_Symbol=MLIP Uncharacterized protein  
Tax\_Id=9606 Gene\_Symbol=ZFR Uncharacterized protein  
Tax\_Id=9606 Gene\_Symbol=- Rheumatoid factor RF-ET13  
Tax\_Id=9606 Gene\_Symbol=KDM3A Putative zinc finger protein  
Tax\_Id=9606 Gene\_Symbol=- Similar to ribosomal protein S14  
Tax\_Id=9606 Gene\_Symbol=LOC440786 Ig kappa chain V-II region TEW  
Tax\_Id=9606 Gene\_Symbol=LOC728419;USP17 Ubiquitin carboxyl-terminal hydrolase 17  
Tax\_Id=9606 Gene\_Symbol=MEN1 Uncharacterized protein  
Tax\_Id=9606 Gene\_Symbol=PLCH2 Isoform 1 of 1-phosphatidylinositol-4;;;5-bisphosphate phosphodiesterase eta-2  
Tax\_Id=9606 Gene\_Symbol=YWHAQP8 14-3-3 tau splice variant  
Tax\_Id=9606 Gene\_Symbol=PRKD1 Uncharacterized protein  
Tax\_Id=9606 Gene\_Symbol=ZNF1 Zinc finger;;; NFX1-type containing 1  
Tax\_Id=9606 Gene\_Symbol=KIAA0090 Isoform 4 of Uncharacterized protein KIAA0090  
Tax\_Id=9606 Gene\_Symbol=IGHA2 Ig alpha-2 chain C region  
Tax\_Id=9606 Gene\_Symbol=KRT18 Keratin;;; type I cytoskeletal 18 Tax\_Id=9606  
Gene\_Symbol=L3MBTL1 L(3)mbt-like  
Tax\_Id=9606 Gene\_Symbol=GPN2 GPN-loop GTPase 2  
Tax\_Id=9606 Gene\_Symbol=DAK Bifunctional ATP-dependent dihydroxyacetone kinase/FAD-AMP lyase (cyclizing)  
Tax\_Id=9606 Gene\_Symbol=SERPINA3 Isoform 2 of Alpha-1-antichymotrypsin  
Tax\_Id=9606 Gene\_Symbol=TRIM56 Isoform 1 of E3 ubiquitin-protein ligase TRIM56  
Tax\_Id=9606 Gene\_Symbol=SLC2A6 Uncharacterized protein  
Tax\_Id=9606 Gene\_Symbol=MTSS1L Uncharacterized protein  
Tax\_Id=9606 Gene\_Symbol=DCLRE1A DNA cross-link repair 1A protein  
Tax\_Id=9606 Gene\_Symbol=MEX3D Isoform 1 of RNA-binding protein MEX3D  
Tax\_Id=9606 Gene\_Symbol=ZNF528 Isoform 1 of Zinc finger protein 528  
Tax\_Id=9606 Gene\_Symbol=MDC1 Isoform 2 of Mediator of DNA damage checkpoint protein 1  
Tax\_Id=9606 Gene\_Symbol=IRS2 Insulin receptor substrate 2 insertion mutant (Fragment)  
Tax\_Id=9606 Gene\_Symbol=HIST2H4B;HIST1H4C;HIST1H4J;HIST1H4D;HIST1H4A;HIST2H4A;HIST1H4I;HIST1H4K;HIST1H4E;HIST1H4L;HIST1H4F;HIST1H4H;HIST4H4;HIST1H4B Histone H4  
Tax\_Id=9606 Gene\_Symbol=LOC100507777 Hypothetical LOC650669  
Tax\_Id=9606 Gene\_Symbol=ARID2 Isoform 2 of AT-rich interactive domain-containing protein 2  
Tax\_Id=9606 Gene\_Symbol=MCC Isoform 2 of Colorectal mutant cancer protein  
Tax\_Id=9606 Gene\_Symbol=DPY19L2P1 Protein dpy-19 homolog 2-like 1  
Tax\_Id=9606 Gene\_Symbol=STK31 Isoform 1 of Serine/threonine-protein kinase 31  
Tax\_Id=9606 Gene\_Symbol=TECPR2 Tectonin beta-propeller repeat-containing protein 2  
Tax\_Id=9606 Gene\_Symbol=NHSL1 Isoform 2 of NHS-like protein 1  
Tax\_Id=9606 Gene\_Symbol=PHLDB1 Isoform 1 of Pleckstrin homology-like domain family B member 1  
Tax\_Id=9606 Gene\_Symbol=TACR2 Substance-K receptor  
Tax\_Id=9606 Gene\_Symbol=SKOR1 Isoform 1 of SKI family transcriptional corepressor 1  
Tax\_Id=9606 Gene\_Symbol=- Myosin-reactive immunoglobulin light chain variable region (Fragment)  
Tax\_Id=9606 Gene\_Symbol=TRIM75 Tripartite motif-containing protein 75  
Tax\_Id=9606 Gene\_Symbol=LOC646652 Similar to SubName: Full=Predicted protein; Flags: Fragment;  
Tax\_Id=9606 Gene\_Symbol=EEF1A1 Elongation factor 1-alpha 1  
Tax\_Id=9606 Gene\_Symbol=MKRN2 Probable E3 ubiquitin-protein ligase makorin-2  
Tax\_Id=9606 Gene\_Symbol=CLASP1 Isoform 1 of CLIP-associating protein 1  
Tax\_Id=9606 Gene\_Symbol=KLRG2 Isoform 1 of Killer cell lectin-like receptor subfamily G member 2  
Tax\_Id=9606 Gene\_Symbol=CSMD1 Isoform 1 of CUB and sushi domain-containing protein 1  
Tax\_Id=9606 Gene\_Symbol=OR2L8 Olfactory receptor 2L8  
Tax\_Id=9606 Gene\_Symbol=SLC8A2 Uncharacterized protein  
Tax\_Id=9606 Gene\_Symbol=- cDNA FLJ38599 fis;;; clone HEART2003432;;; weakly similar to ENDOGLUCANASE Z

Tax\_Id=9606 Gene\_Symbol=DLST;DLSTP1 cDNA FLJ55034;;; highly similar to Dihydropolyllysine-residue succinyltransferase component of 2- oxoglutarate dehydrogenase complex;;; mitochondrial Tax\_Id=9606  
Gene\_Symbol=- I g heavy chain V-II region OU  
Tax\_Id=9606 Gene\_Symbol=- I g lambda chain V-IV region Hill  
Tax\_Id=9606 Gene\_Symbol=DDHD1 Isoform 1 of Phospholipase DDHD1  
Tax\_Id=9606 Gene\_Symbol=KRT80 Isoform 3 of Keratin;;; type II cytoskeletal 80  
Tax\_Id=9606 Gene\_Symbol=LAMA1 Laminin subunit alpha-1  
Tax\_Id=9606 Gene\_Symbol=ACSM2A cDNA FLJ31305 fis;;; clone LIVER1000104;;; highly similar to Homo sapiens acyl-CoA synthetase medium-chain family member 2 (ACSM2);;; nuclear gene encoding mitochondrial protein;;; mRNA  
Tax\_Id=9606 Gene\_Symbol=CHPT1 Isoform 1 of Cholinephosphotransferase 1  
Tax\_Id=9606 Gene\_Symbol=DNAJC13 DnaJ homolog subfamily C member 13  
Tax\_Id=9606 Gene\_Symbol=PFKFB2 Isoform 1 of 6-phosphofructo-2-kinase/fructose-2-kinase-6-biphosphatase 2  
Tax\_Id=9606 Gene\_Symbol=CENPC1 Centromere protein C 1  
Tax\_Id=9606 Gene\_Symbol=TNKS1BP1 Isoform 1 of 182 kDa tankyrase-1-binding protein  
Tax\_Id=9606 Gene\_Symbol=C7orf57 Uncharacterized protein  
Tax\_Id=9606 Gene\_Symbol=MIOS Isoform 1 of WD repeat-containing protein mio  
Tax\_Id=9606 Gene\_Symbol=ZNF33A Zinc finger protein 33A  
Tax\_Id=9606 Gene\_Symbol=TRIM15 Isoform 1 of Tripartite motif-containing protein 15  
Tax\_Id=9606 Gene\_Symbol=CLCA2 Calcium-activated chloride channel regulator 2  
Tax\_Id=9606 Gene\_Symbol=STIM1 Stromal interaction molecule 1  
Tax\_Id=9606 Gene\_Symbol=LTF cDNA FLJ78440;;; highly similar to Human lactoferrin  
Tax\_Id=9606 Gene\_Symbol=RWDD2A RWD domain-containing protein 2A  
Tax\_Id=9606 Gene\_Symbol=MAP1S Microtubule-associated protein 1S  
Tax\_Id=9606 Gene\_Symbol=ALDH3A1 Aldehyde dehydrogenase;;; dimeric NADP-preferring  
Tax\_Id=9606 Gene\_Symbol=CYP51A1 lanosterol 14-alpha demethylase isoform 1  
Tax\_Id=9606 Gene\_Symbol=LARP1B la-related protein 1B isoform 2  
Tax\_Id=9606 Gene\_Symbol=ABCA5 Isoform 1 of ATP-binding cassette sub-family A member 5  
Tax\_Id=9606 Gene\_Symbol=KRT15 Keratin;;; type I cytoskeletal 15  
Tax\_Id=9606 Gene\_Symbol=ZMIZ2 Isoform 2 of Zinc finger MIZ domain-containing protein 2  
Tax\_Id=9606 Gene\_Symbol=IQCA1P1 Putative IQ and AAA domain-containing protein 1-like  
Tax\_Id=9606 Gene\_Symbol=HEATR2 Isoform 1 of HEAT repeat-containing protein 2  
Tax\_Id=9606 Gene\_Symbol=SERPINA12 Serpin A12  
Tax\_Id=9606 Gene\_Symbol=GRIA3 Isoform Flip of Glutamate receptor 3  
Tax\_Id=9606 Gene\_Symbol=GUCA1B Guanylyl cyclase-activating protein 2  
Tax\_Id=9606 Gene\_Symbol=GAPDH Glyceraldehyde-3-phosphate dehydrogenase  
Tax\_Id=9606 Gene\_Symbol=ANXA1 Annexin A1  
Tax\_Id=9606 Gene\_Symbol=UTY Ubiquitously transcribed tetratricopeptide repeat protein Y-linked transcript variant 29  
Tax\_Id=9606 Gene\_Symbol=ITPR1 Isoform 2 of Inositol 1-;4-;5-trisphosphate receptor type 1  
Tax\_Id=9606 Gene\_Symbol=ENO3 Isoform 1 of Beta-enolase  
Tax\_Id=9606 Gene\_Symbol=C18orf54 Isoform 1 of Uncharacterized protein C18orf54  
Tax\_Id=9606 Gene\_Symbol=SUCLA2 Isoform 2 of Succinyl-CoA ligase [ADP-forming] subunit beta;;; mitochondrial  
Tax\_Id=9606 Gene\_Symbol=NOLC1 Isoform Beta of Nucleolar and coiled-body phosphoprotein 1  
Tax\_Id=9606 Gene\_Symbol=CDH23 Uncharacterized protein  
Tax\_Id=9606 Gene\_Symbol=SRPX Isoform 2 of Sushi repeat-containing protein SRPX  
Tax\_Id=9606 Gene\_Symbol=USP11 Ubiquitin carboxyl-terminal hydrolase 11  
Tax\_Id=9606 Gene\_Symbol=EMR2 Isoform 3 of EGF-like module-containing mucin-like hormone receptor-like 2  
Tax\_Id=9606 Gene\_Symbol=CNTN5 Isoform 2 of Contactin-5  
Tax\_Id=9606 Gene\_Symbol=VPS53 Isoform 2 of Vacuolar protein sorting-associated protein 53 homolog  
Tax\_Id=9606 Gene\_Symbol=CCDC120 cDNA FLJ56060;;; weakly similar to FERM domain-containing protein 4B  
Tax\_Id=9606 Gene\_Symbol=RPS27A Ubiquitin-40S ribosomal protein S27a  
Tax\_Id=9606 Gene\_Symbol=COL14A1 Isoform 1 of Collagen alpha-1(XIV) chain  
Tax\_Id=9606 Gene\_Symbol=GRM6 Seven transmembrane helix receptor  
Tax\_Id=9606 Gene\_Symbol=- FLJ00396 protein (Fragment)  
Tax\_Id=9606 Gene\_Symbol=GGN Isoform 1 of Gametogenetin  
Tax\_Id=9606 Gene\_Symbol=FAM133A Protein FAM133A  
Tax\_Id=9606 Gene\_Symbol=EID2 EID2 protein (Fragment)  
Tax\_Id=9606 Gene\_Symbol=AZGP1 Zinc-alpha-2-glycoprotein  
Tax\_Id=9606 Gene\_Symbol=LGI4 Isoform 1 of Leucine-rich repeat LGI family member 4  
Tax\_Id=9606 Gene\_Symbol=DGCR8 Isoform 1 of Microprocessor complex subunit DGCR8  
Tax\_Id=9606 Gene\_Symbol=ZNF292 Isoform 1 of Zinc finger protein 292  
Tax\_Id=9606 Gene\_Symbol=CHMP1B Charged multivesicular body protein 1b  
Tax\_Id=9606 Gene\_Symbol=PARP6 Isoform 1 of Poly [ADP-ribose] polymerase 6  
Tax\_Id=9606 Gene\_Symbol=PDZD2 Isoform 2 of PDZ domain-containing protein 2  
Tax\_Id=9606 Gene\_Symbol=IGLV2-14;IGLC2 IGL@ protein  
Tax\_Id=9606 Gene\_Symbol=CD99L2 Isoform 3 of CD99 antigen-like protein 2  
Tax\_Id=9606 Gene\_Symbol=AMBRA1 Isoform 2 of Activating molecule in BECN1-regulated autophagy protein 1  
Tax\_Id=9606 Gene\_Symbol=MTMR14 Putative uncharacterized protein  
Tax\_Id=9606 Gene\_Symbol=TRUB1 Probable tRNA pseudouridine synthase 1  
Tax\_Id=9606 Gene\_Symbol=PCSK7 Proprotein convertase subtilisin/kexin type 7



Tax\_Id=9606 Gene\_Symbol=PDE11A Phosphodiesterase 11A isoform 3  
Tax\_Id=9606 Gene\_Symbol=ZG16B Zymogen granule protein 16 homolog B  
Tax\_Id=9606 Gene\_Symbol=CRBN Isoform 1 of Protein cereblon  
Tax\_Id=9606 Gene\_Symbol=FZR1 Isoform 3 of Fizzy-related protein homolog  
Tax\_Id=9606 Gene\_Symbol=SAGE1 Sarcoma antigen 1  
Tax\_Id=9606 Gene\_Symbol=RAB3D Ras-related protein Rab-3D  
Tax\_Id=9606 Gene\_Symbol=PPP2R2C Isoform 1 of Serine/threonine-protein phosphatase 2A 55 kDa regulatory subunit B gamma isoform  
Tax\_Id=9606 Gene\_Symbol=ZBTB12 Zinc finger and BTB domain-containing protein 12  
Tax\_Id=9606 Gene\_Symbol=C4A Complement C4-A  
Tax\_Id=9606 Gene\_Symbol=GRIA2 Isoform Flop of Glutamate receptor 2  
Tax\_Id=9606 Gene\_Symbol=APOM Apolipoprotein M  
Tax\_Id=9606 Gene\_Symbol=KIF1B Isoform 1 of Kinesin-like protein KIF1B  
Tax\_Id=9606 Gene\_Symbol=OTX2 Isoform 1 of Homeobox protein OTX2  
Tax\_Id=9606 Gene\_Symbol=GUCA2A Guanylin  
Tax\_Id=9606 Gene\_Symbol=NIPBL Isoform 2 of Nipped-B-like protein  
Tax\_Id=9606 Gene\_Symbol=HSPB1 Heat shock protein beta-1  
Tax\_Id=9606 Gene\_Symbol=FCN2 Isoform 2 of Ficolin-2  
Tax\_Id=9606 Gene\_Symbol=ALDH6A1 Methylmalonate-semialdehyde dehydrogenase [acylating];; mitochondrial  
Tax\_Id=9606 Gene\_Symbol=UBQLN4 Isoform 1 of Ubiquilin-4  
Tax\_Id=9606 Gene\_Symbol=PRO0843  
Tax\_Id=9606 Gene\_Symbol=EPB41L1 Isoform 1 of Band 4.1-like protein 1  
Tax\_Id=9606 Gene\_Symbol=SBNO1 Isoform 1 of Protein strawberry notch homolog 1  
Tax\_Id=9606 Gene\_Symbol=TTN Isoform 2 of Titin  
Tax\_Id=9606 Gene\_Symbol=PIP Prolactin-inducible protein  
Tax\_Id=9606 Gene\_Symbol=SLC12A2 Isoform 1 of Solute carrier family 12 member 2  
Tax\_Id=9606 Gene\_Symbol=AFP Alpha-fetoprotein  
Tax\_Id=9606 Gene\_Symbol=TFF1 Trefoil factor 1  
Tax\_Id=9606 Gene\_Symbol=COL6A3 Isoform 1 of Collagen alpha-3(VI) chain  
Tax\_Id=9606 Gene\_Symbol=SART1 U4/U6.U5 tri-snRNP-associated protein 1  
Tax\_Id=9606 Gene\_Symbol=LMNA Isoform A of Prelamin-A/C  
Tax\_Id=9606 Gene\_Symbol=PGLYRP1 Peptidoglycan recognition protein 1  
Tax\_Id=9606 Gene\_Symbol=TSFM Isoform 1 of Elongation factor Ts; mitochondrial  
Tax\_Id=9606 Gene\_Symbol=CLCN2 Isoform 1 of Chloride channel protein 2  
Tax\_Id=9606 Gene\_Symbol=SLTM SAFB-like transcription modulator isoform b  
Tax\_Id=9606 Gene\_Symbol=HCFC1 Isoform 1 of Host cell factor 1  
Tax\_Id=9606 Gene\_Symbol=IRS1 Insulin receptor substrate 1  
Tax\_Id=9606 Gene\_Symbol=SAA4 Serum amyloid A-4 protein  
Tax\_Id=9606 Gene\_Symbol=PBX4 Pre-B-cell leukemia transcription factor 4  
Tax\_Id=9606 Gene\_Symbol=LYZ Lysozyme C  
Tax\_Id=9606 Gene\_Symbol=GGT1 Isoform 1 of Gamma-glutamyltranspeptidase 1  
Tax\_Id=9606 Gene\_Symbol=TRIP4 Activating signal cointegrator 1  
Tax\_Id=9606 Gene\_Symbol=SMPD1 protein  
Tax\_Id=9606 Gene\_Symbol=TCEA2 Transcription elongation factor A protein 2  
Tax\_Id=9606 Gene\_Symbol=CCRL2 Isoform 2 of C-C chemokine receptor-like 2  
Tax\_Id=9606 Gene\_Symbol=Uncharacterized protein  
Tax\_Id=9606 Gene\_Symbol=SEC23A Protein transport protein Sec23A Tax\_Id=9606  
Gene\_Symbol=MSH2 DNA mismatch repair protein Msh2  
Tax\_Id=9606 Gene\_Symbol=PLEC Isoform 1 of Plectin  
Tax\_Id=9606 Gene\_Symbol=SLC39A14 Isoform 1 of Zinc transporter ZIP14  
Tax\_Id=9606 Gene\_Symbol=DSP Isoform DPI of Desmoplakin  
Tax\_Id=9606 Gene\_Symbol=PDAP1 28 kDa heat- and acid-stable phosphoprotein  
Tax\_Id=9606 Gene\_Symbol=DNMT3B Isoform 1 of DNA (cytosine-5)-methyltransferase 3B  
Tax\_Id=9606 Gene\_Symbol=BTG1 Protein BTG1  
Tax\_Id=9606 Gene\_Symbol=MXRA5 Matrix-remodeling-associated protein 5  
Tax\_Id=9606 Gene\_Symbol=SEMA3B Isoform 1 of Semaphorin-3B  
Tax\_Id=9606 Gene\_Symbol=SIGLEC1 Isoform 1 of Sialoadhesin  
Tax\_Id=9606 Gene\_Symbol=EMILIN3 EMILIN-3  
Tax\_Id=9606 Gene\_Symbol=SLC4A3 Isoform BAE3 of Anion exchange protein 3  
Tax\_Id=9606 Gene\_Symbol=TBC1D22A Isoform 1 of TBC1 domain family member 22A  
Tax\_Id=9606 Gene\_Symbol=MARCH7 E3 ubiquitin-protein ligase MARCH7  
Tax\_Id=9606 Gene\_Symbol=KRT13 Isoform 1 of Keratin; type I cytoskeletal 13  
Tax\_Id=9606 Gene\_Symbol=SLC15A3 Solute carrier family 15 member 3  
Tax\_Id=9606 Gene\_Symbol=PFKP 6-phosphofructokinase type C  
Tax\_Id=9606 Gene\_Symbol=ANAPC5 Isoform 1 of Anaphase-promoting complex subunit  
Tax\_Id=9606 Gene\_Symbol=NRXN2 Isoform 1a of Neurexin-2-alpha  
Tax\_Id=9606 Gene\_Symbol=ADAM30 Isoform Alpha of Disintegrin and metalloproteinase domain-containing protein 30  
Tax\_Id=9606 Gene\_Symbol=MPO Isoform H17 of Myeloperoxidase

Tax\_Id=9606 Gene\_Symbol=ALDH2 Aldehyde dehydrogenase;;; mitochondrial  
Tax\_Id=9606 Gene\_Symbol=APP Isoform APP770 of Amyloid beta A4 protein (Fragment)  
Tax\_Id=9606 Gene\_Symbol=KIAA0494 EF-hand domain-containing protein KIAA0494  
Tax\_Id=9606 Gene\_Symbol=CEP104 Isoform 1 of Centrosomal protein of 104 kDa  
Tax\_Id=9606 Gene\_Symbol=WDR5 WD repeat-containing protein 5  
Tax\_Id=9606 Gene\_Symbol=PIGH Phosphatidylinositol N-acetylglucosaminyltransferase subunit H  
Tax\_Id=9606 Gene\_Symbol=PIGR Polymeric immunoglobulin receptor  
Tax\_Id=9606 Gene\_Symbol=ADD3 Isoform 2 of Gamma-adducin  
Tax\_Id=9606 Gene\_Symbol=PSMD10 26S proteasome non-ATPase regulatory subunit 10  
Tax\_Id=9606 Gene\_Symbol=ZNF684 Zinc finger protein 684  
Tax\_Id=9606 Gene\_Symbol=ACTBL2 Beta-actin-like protein 2  
Tax\_Id=9606 Gene\_Symbol=PI4KB Isoform 1 of Phosphatidylinositol 4-kinase beta  
Tax\_Id=9606 Gene\_Symbol=NCOR2 Isoform 1 of Nuclear receptor corepressor 2  
Tax\_Id=9606 Gene\_Symbol=USP35 Isoform 1 of Ubiquitin carboxyl-terminal hydrolase 35
